# Supplementary material
Source: PubMed Central journal article supplement (PMC2597297)
Supplement: NIHMS61545-supplement-si20060719_045.pdf [file NIHMS61545-supplement-si20060719_045.pdf]

Supporting Information for  
Synthesis of Molybdenum Complexes that Contain "Hybrid" Triamidoamine Ligands,  
[(Hexaisopropylterphenyl)NCH<sub>2</sub>CH<sub>2</sub>)<sub>2</sub>NCH<sub>2</sub>CH<sub>2</sub>NAryl]<sup>3+</sup>, and Studies Relevant to  
Catalytic Reduction of Dinitrogen

Walter W. Weare, Richard R. Schrock\*, Adam S. Hock, and Peter Müller

For **3c** (04072) and **5d** (04169)

1. Partially labeled ORTEP drawing
2. Crystal data and structure refinement
  3. Atomic coordinates
  4. Bond lengths and angles
  5. Anisotropic thermal parameters
6. Hydrogen atom coordinates and isotropic displacement parameters

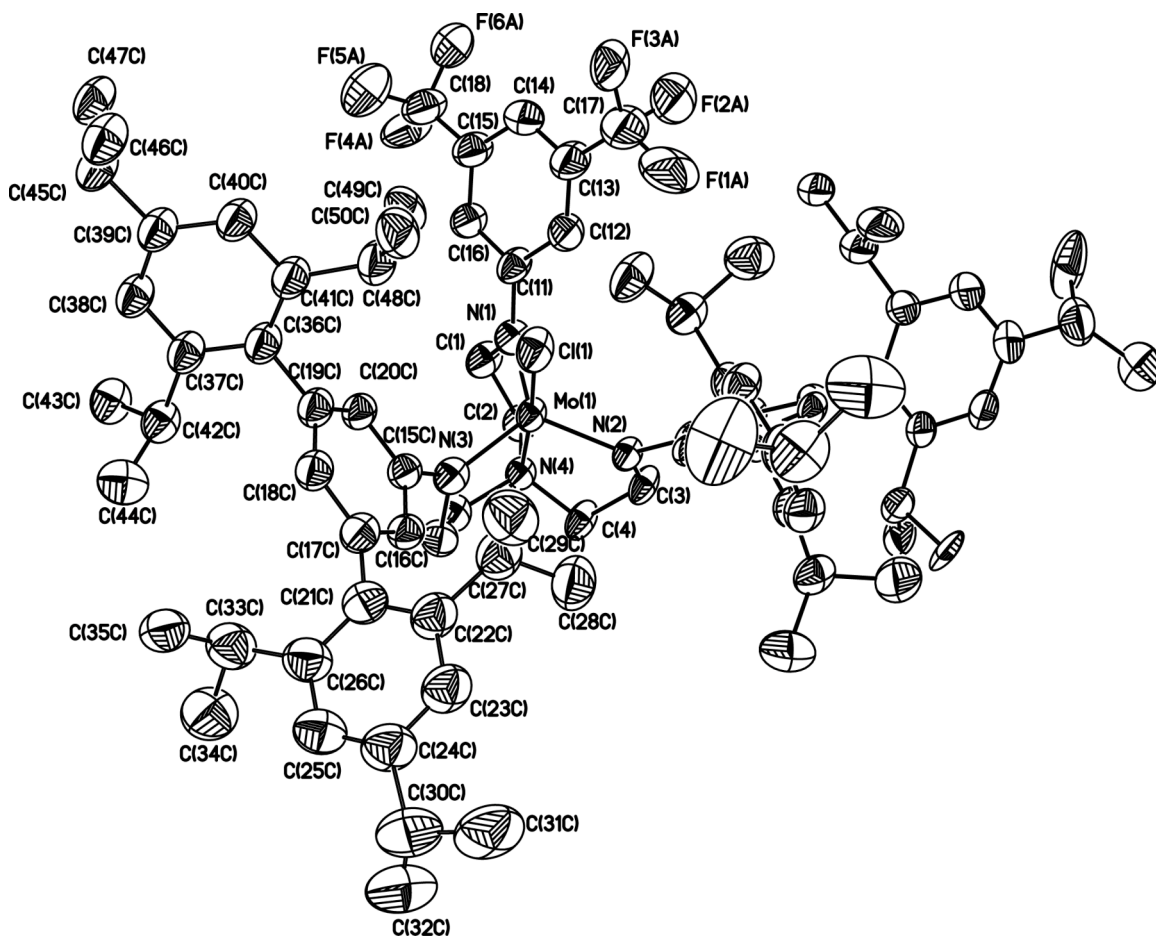

Figure 1. Thermal Ellipsoid Plot (50% probability level) of the structure of **04072**. Hydrogen atoms and co-crystallized solvent molecules have been omitted for clarity. Only one orientation of the disorder portion of the molecule is shown. The full labeling scheme may be seen on <http://reciprocal.lms.mit.edu/recipnet/index.jsp> by searching the code 04072..

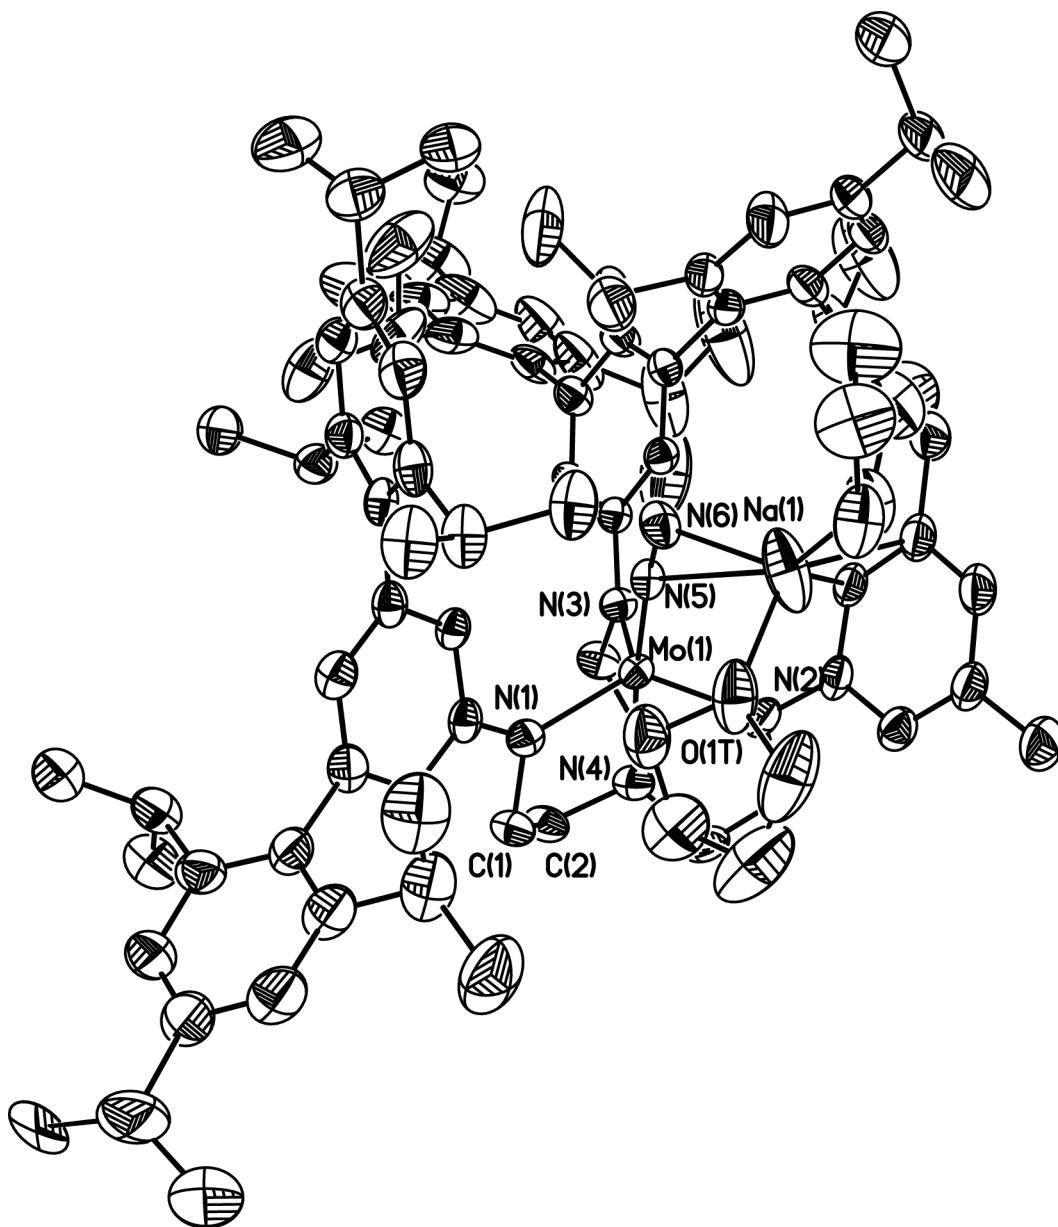

Figure 2. Thermal Ellipsoid Plot (50% probability level) of the structure of **04169**. Hydrogen atoms and co-crystallized solvent molecules have been omitted for clarity. Only one orientation of the disorder portion of the molecule is shown. The full labeling scheme may be seen on <http://reciprocal.lms.mit.edu/recipnet/index.jsp> by searching the code 04169.

**Table 1. Crystal data and structure refinement for [(HIPTNCH<sub>2</sub>CH<sub>2</sub>)<sub>2</sub>NCH<sub>2</sub>CH<sub>2</sub>N{3,5-(CF<sub>3</sub>)<sub>2</sub>C<sub>6</sub>H<sub>3</sub>}]MoCl.**

|                                   |                                                                      |          |
|-----------------------------------|----------------------------------------------------------------------|----------|
| Identification code               | 04072                                                                |          |
| Empirical formula                 | C <sub>86</sub> H <sub>113</sub> Cl F <sub>6</sub> Mo N <sub>4</sub> |          |
| Formula weight                    | 1448.19                                                              |          |
| Temperature                       | 193(2) K                                                             |          |
| Wavelength                        | 0.71073 Å                                                            |          |
| Crystal system                    | Orthorhombic                                                         |          |
| Space group                       | Pbcn                                                                 |          |
| Unit cell dimensions              | a = 33.780(7) Å                                                      | a = 90°. |
|                                   | b = 23.053(5) Å                                                      | b = 90°. |
|                                   | c = 21.560(4) Å                                                      | g = 90°. |
| Volume                            | 16790(6) Å <sup>3</sup>                                              |          |
| Z                                 | 8                                                                    |          |
| Density (calculated)              | 1.146 Mg/m <sup>3</sup>                                              |          |
| Absorption coefficient            | 0.244 mm <sup>-1</sup>                                               |          |
| F(000)                            | 6160                                                                 |          |
| Crystal size                      | 0.28 x 0.15 x 0.08 mm <sup>3</sup>                                   |          |
| Theta range for data collection   | 1.77 to 21.01°.                                                      |          |
| Index ranges                      | 0 ≤ h ≤ 34, 0 ≤ k ≤ 23, 0 ≤ l ≤ 21                                   |          |
| Reflections collected             | 62854                                                                |          |
| Independent reflections           | 8986 [R(int) = 0.1130]                                               |          |
| Completeness to theta = 21.01°    | 99.5 %                                                               |          |
| Absorption correction             | Semi-empirical from equivalents                                      |          |
| Max. and min. transmission        | 0.9807 and 0.9348                                                    |          |
| Refinement method                 | Full-matrix least-squares on F <sup>2</sup>                          |          |
| Data / restraints / parameters    | 8986 / 2559 / 1311                                                   |          |
| Goodness-of-fit on F <sup>2</sup> | 1.121                                                                |          |
| Final R indices [I > 2σ(I)]       | R1 = 0.0743, wR2 = 0.1900                                            |          |
| R indices (all data)              | R1 = 0.1187, wR2 = 0.2208                                            |          |
| Largest diff. peak and hole       | 0.823 and -0.786 e.Å <sup>-3</sup>                                   |          |

**Table 2. Atomic coordinates (  $\times 10^4$ ) and equivalent isotropic displacement parameters ( $\text{\AA}^2 \times 10^3$ ) for 04072.  $U(\text{eq})$  is defined as one third of the trace of the orthogonalized  $U^{ij}$  tensor.**

|        | x        | y        | z         | $U(\text{eq})$ |
|--------|----------|----------|-----------|----------------|
| Cl(1)  | 1921(1)  | 3078(1)  | -161(1)   | 58(1)          |
| Mo(1)  | 2141(1)  | 2424(1)  | 588(1)    | 38(1)          |
| N(1)   | 2545(2)  | 1997(2)  | 105(3)    | 46(2)          |
| C(11)  | 2708(3)  | 2118(3)  | -468(4)   | 48(2)          |
| C(12)  | 2786(3)  | 2698(4)  | -652(4)   | 58(2)          |
| C(13)  | 2950(3)  | 2833(4)  | -1204(4)  | 69(3)          |
| C(17)  | 3009(3)  | 3438(4)  | -1377(4)  | 91(3)          |
| F(1)   | 3286(4)  | 3556(4)  | -1759(7)  | 115(4)         |
| F(2)   | 2677(4)  | 3641(4)  | -1712(5)  | 98(3)          |
| F(3)   | 3009(5)  | 3808(5)  | -925(6)   | 94(3)          |
| F(1A)  | 2904(9)  | 3829(10) | -980(11)  | 115(4)         |
| F(2A)  | 3424(4)  | 3513(7)  | -1339(10) | 98(3)          |
| F(3A)  | 2985(8)  | 3577(7)  | -1952(6)  | 94(3)          |
| C(14)  | 3054(3)  | 2405(4)  | -1619(4)  | 63(2)          |
| C(15)  | 2972(3)  | 1838(4)  | -1463(4)  | 58(2)          |
| C(18)  | 3075(3)  | 1373(4)  | -1895(4)  | 71(2)          |
| F(4)   | 3191(5)  | 1533(4)  | -2449(4)  | 94(3)          |
| F(5)   | 3363(4)  | 1044(6)  | -1668(5)  | 95(3)          |
| F(6)   | 2782(3)  | 1001(6)  | -1987(7)  | 97(3)          |
| F(4A)  | 3202(11) | 883(8)   | -1665(10) | 94(3)          |
| F(5A)  | 2792(7)  | 1240(13) | -2289(14) | 95(3)          |
| F(6A)  | 3376(8)  | 1535(11) | -2263(13) | 97(3)          |
| C(16)  | 2806(3)  | 1701(3)  | -904(4)   | 52(2)          |
| N(2)   | 2357(2)  | 2940(2)  | 1226(3)   | 39(2)          |
| C(215) | 2421(2)  | 3551(3)  | 1185(3)   | 38(2)          |
| C(216) | 2790(2)  | 3784(3)  | 1293(3)   | 38(2)          |
| C(217) | 2851(2)  | 4383(3)  | 1267(3)   | 36(2)          |
| C(218) | 2534(2)  | 4724(3)  | 1119(3)   | 37(2)          |
| C(219) | 2159(2)  | 4513(3)  | 1010(3)   | 34(2)          |
| C(220) | 2105(2)  | 3914(3)  | 1058(3)   | 36(2)          |
| C(221) | 3242(2)  | 4643(3)  | 1421(3)   | 40(2)          |

|        |           |          |           |         |
|--------|-----------|----------|-----------|---------|
| C(222) | 3483(2)   | 4851(3)  | 955(3)    | 46(2)   |
| C(223) | 3827(2)   | 5135(3)  | 1111(4)   | 55(2)   |
| C(224) | 3938(3)   | 5230(4)  | 1721(4)   | 60(2)   |
| C(225) | 3693(2)   | 5005(3)  | 2171(4)   | 54(2)   |
| C(226) | 3348(2)   | 4717(3)  | 2038(3)   | 45(2)   |
| C(227) | 3395(3)   | 4760(3)  | 273(3)    | 53(2)   |
| C(228) | 3389(8)   | 5323(4)  | -92(5)    | 71(4)   |
| C(229) | 3693(5)   | 4338(5)  | -1(9)     | 75(4)   |
| C(28B) | 3180(110) | 5270(80) | -20(120)  | 60(30)  |
| C(29B) | 3570(110) | 4360(90) | -200(100) | 60(30)  |
| C(230) | 4311(3)   | 5554(4)  | 1867(5)   | 78(3)   |
| C(231) | 4250(8)   | 6003(11) | 2343(12)  | 96(8)   |
| C(232) | 4637(5)   | 5181(8)  | 1925(16)  | 100(7)  |
| C(31B) | 4389(19)  | 5910(30) | 2430(30)  | 69(14)  |
| C(32B) | 4643(11)  | 5350(40) | 1530(40)  | 108(19) |
| C(233) | 3098(3)   | 4489(3)  | 2560(4)   | 49(2)   |
| C(234) | 3270(5)   | 3923(8)  | 2822(10)  | 66(5)   |
| C(235) | 3039(6)   | 4941(7)  | 3082(8)   | 72(4)   |
| C(34B) | 3320(40)  | 4130(60) | 3050(60)  | 60(20)  |
| C(35B) | 2900(50)  | 5020(40) | 2880(70)  | 70(20)  |
| C(236) | 1839(2)   | 4930(3)  | 850(3)    | 37(2)   |
| C(237) | 1657(2)   | 5248(3)  | 1312(3)   | 47(2)   |
| C(238) | 1400(2)   | 5680(3)  | 1138(4)   | 52(2)   |
| C(239) | 1317(2)   | 5807(3)  | 534(4)    | 54(2)   |
| C(240) | 1491(2)   | 5468(3)  | 82(4)     | 51(2)   |
| C(241) | 1754(2)   | 5022(3)  | 232(3)    | 43(2)   |
| C(242) | 1722(2)   | 5119(3)  | 1996(3)   | 52(2)   |
| C(243) | 1343(3)   | 5065(5)  | 2347(4)   | 86(3)   |
| C(244) | 1989(3)   | 5538(5)  | 2329(4)   | 86(3)   |
| C(245) | 1044(3)   | 6300(4)  | 352(5)    | 78(3)   |
| C(246) | 639(4)    | 6226(7)  | 565(10)   | 110(7)  |
| C(247) | 1212(5)   | 6888(5)  | 505(11)   | 102(6)  |
| C(46B) | 722(12)   | 6088(18) | -40(20)   | 125(16) |
| C(47B) | 1258(12)  | 6799(15) | 40(20)    | 105(14) |
| C(248) | 1939(3)   | 4668(3)  | -283(4)   | 51(2)   |
| C(249) | 1651(4)   | 4443(18) | -763(9)   | 64(5)   |

|        |          |           |           |        |
|--------|----------|-----------|-----------|--------|
| C(250) | 2282(9)  | 4975(17)  | -594(15)  | 83(6)  |
| C(49B) | 1660(30) | 4670(80)  | -840(40)  | 64(5)  |
| C(50B) | 2330(30) | 4960(100) | -440(80)  | 68(18) |
| N(3)   | 1639(2)  | 2043(3)   | 716(3)    | 45(2)  |
| C(315) | 1271(4)  | 2153(12)  | 417(7)    | 43(2)  |
| C(316) | 957(4)   | 2443(8)   | 696(7)    | 45(2)  |
| C(317) | 617(4)   | 2570(5)   | 358(6)    | 50(2)  |
| C(318) | 602(5)   | 2399(8)   | -255(6)   | 49(2)  |
| C(319) | 906(4)   | 2099(9)   | -547(6)   | 49(2)  |
| C(320) | 1240(5)  | 1987(13)  | -204(7)   | 45(2)  |
| C(321) | 286(3)   | 2911(5)   | 630(5)    | 60(2)  |
| C(322) | 319(3)   | 3509(5)   | 679(5)    | 65(2)  |
| C(323) | 16(3)    | 3821(6)   | 956(6)    | 71(2)  |
| C(324) | -315(4)  | 3550(6)   | 1188(7)   | 78(2)  |
| C(325) | -346(4)  | 2955(6)   | 1114(7)   | 75(2)  |
| C(326) | -59(4)   | 2639(5)   | 834(6)    | 67(2)  |
| C(327) | 666(4)   | 3839(6)   | 411(7)    | 71(3)  |
| C(328) | 532(5)   | 4279(7)   | -77(8)    | 96(4)  |
| C(329) | 904(5)   | 4125(7)   | 903(8)    | 96(4)  |
| C(330) | -649(5)  | 3885(7)   | 1511(7)   | 102(3) |
| C(331) | -665(5)  | 4509(7)   | 1317(8)   | 117(5) |
| C(332) | -665(6)  | 3733(9)   | 2150(8)   | 124(5) |
| C(333) | -112(5)  | 1990(6)   | 793(7)    | 77(2)  |
| C(334) | -134(6)  | 1738(8)   | 1446(7)   | 114(5) |
| C(335) | -492(6)  | 1830(10)  | 437(8)    | 92(5)  |
| C(336) | 866(4)   | 1941(6)   | -1212(6)  | 51(2)  |
| C(337) | 690(5)   | 1419(6)   | -1390(7)  | 50(2)  |
| C(338) | 604(5)   | 1335(8)   | -2006(7)  | 52(2)  |
| C(339) | 678(8)   | 1744(10)  | -2447(7)  | 55(2)  |
| C(340) | 875(7)   | 2244(9)   | -2272(7)  | 56(2)  |
| C(341) | 969(7)   | 2349(8)   | -1651(7)  | 56(2)  |
| C(342) | 610(5)   | 940(6)    | -920(8)   | 51(3)  |
| C(343) | 187(5)   | 948(8)    | -713(13)  | 64(4)  |
| C(344) | 722(6)   | 333(7)    | -1148(14) | 64(4)  |
| C(345) | 570(7)   | 1659(11)  | -3124(7)  | 60(2)  |
| C(346) | 927(7)   | 1570(8)   | -3518(10) | 71(4)  |

|        |          |          |           |        |
|--------|----------|----------|-----------|--------|
| C(347) | 317(9)   | 2163(15) | -3367(13) | 65(4)  |
| C(348) | 1188(5)  | 2911(6)  | -1500(8)  | 65(2)  |
| C(349) | 1581(4)  | 2951(7)  | -1843(8)  | 74(3)  |
| C(350) | 934(5)   | 3425(6)  | -1634(8)  | 80(4)  |
| C(15C) | 1289(8)  | 2130(30) | 362(16)   | 44(2)  |
| C(16C) | 971(9)   | 2360(20) | 676(15)   | 46(2)  |
| C(17C) | 615(7)   | 2465(12) | 362(12)   | 52(2)  |
| C(18C) | 598(9)   | 2327(19) | -255(13)  | 50(2)  |
| C(19C) | 919(9)   | 2107(19) | -582(11)  | 49(2)  |
| C(20C) | 1260(10) | 1990(30) | -261(16)  | 46(2)  |
| C(21C) | 290(6)   | 2731(9)  | 727(10)   | 61(2)  |
| C(22C) | 337(6)   | 3292(9)  | 929(9)    | 66(2)  |
| C(23C) | 68(6)    | 3525(10) | 1346(10)  | 73(3)  |
| C(24C) | -244(8)  | 3198(11) | 1561(12)  | 80(3)  |
| C(25C) | -286(8)  | 2637(11) | 1357(13)  | 75(3)  |
| C(26C) | -31(8)   | 2406(10) | 933(13)   | 70(2)  |
| C(27C) | 678(7)   | 3670(11) | 718(12)   | 71(3)  |
| C(28C) | 940(10)  | 3876(16) | 1243(15)  | 84(6)  |
| C(29C) | 551(12)  | 4142(16) | 292(17)   | 89(6)  |
| C(30C) | -504(9)  | 3453(12) | 2076(13)  | 102(4) |
| C(31C) | -410(12) | 4088(12) | 2170(18)  | 114(6) |
| C(32C) | -508(12) | 3092(15) | 2609(14)  | 121(8) |
| C(33C) | -110(10) | 1804(10) | 696(13)   | 77(3)  |
| C(34C) | -216(13) | 1391(15) | 1226(16)  | 97(7)  |
| C(35C) | -449(13) | 1820(20) | 214(16)   | 73(6)  |
| C(36C) | 872(9)   | 1955(12) | -1244(11) | 52(2)  |
| C(37C) | 657(10)  | 1461(13) | -1399(14) | 51(2)  |
| C(38C) | 567(12)  | 1367(16) | -2010(14) | 52(2)  |
| C(39C) | 681(18)  | 1740(20) | -2466(14) | 55(2)  |
| C(40C) | 907(16)  | 2221(19) | -2304(14) | 56(2)  |
| C(41C) | 1004(14) | 2341(16) | -1687(14) | 57(2)  |
| C(42C) | 537(11)  | 1030(13) | -897(18)  | 53(3)  |
| C(43C) | 624(15)  | 416(15)  | -1080(30) | 59(5)  |
| C(44C) | 106(13)  | 1090(20) | -700(30)  | 64(6)  |
| C(45C) | 552(15)  | 1650(20) | -3131(14) | 59(3)  |
| C(46C) | 380(20)  | 2180(30) | -3420(30) | 65(6)  |



|        |          |          |           |       |
|--------|----------|----------|-----------|-------|
| C(47C) | 874(16)  | 1390(19) | -3540(20) | 65(6) |
| C(48C) | 1266(10) | 2863(13) | -1542(17) | 65(3) |
| C(49C) | 1121(10) | 3419(14) | -1839(19) | 74(3) |
| C(50C) | 1691(9)  | 2735(14) | -1710(20) | 72(5) |
| C(1)   | 2650(3)  | 1426(3)  | 353(4)    | 52(2) |
| C(2)   | 2673(3)  | 1483(3)  | 1042(4)   | 47(2) |
| C(3)   | 2581(3)  | 2656(3)  | 1722(3)   | 46(2) |
| C(4)   | 2393(3)  | 2088(3)  | 1866(3)   | 48(2) |
| C(5)   | 1597(3)  | 1666(4)  | 1277(4)   | 53(2) |
| C(6)   | 1982(2)  | 1357(3)  | 1352(4)   | 47(2) |
| N(4)   | 2314(2)  | 1770(2)  | 1279(3)   | 39(1) |

---

**Table 3. Bond lengths [Å] and angles [°] for 04072.**

---

|               |           |
|---------------|-----------|
| Cl(1)-Mo(1)   | 2.331(2)  |
| Mo(1)-N(3)    | 1.931(7)  |
| Mo(1)-N(2)    | 1.959(6)  |
| Mo(1)-N(1)    | 1.978(7)  |
| Mo(1)-N(4)    | 2.199(6)  |
| N(1)-C(11)    | 1.382(10) |
| N(1)-C(1)     | 1.465(9)  |
| C(11)-C(16)   | 1.385(11) |
| C(11)-C(12)   | 1.418(11) |
| C(12)-C(13)   | 1.349(11) |
| C(13)-C(14)   | 1.377(12) |
| C(13)-C(17)   | 1.457(12) |
| C(17)-F(1)    | 1.278(10) |
| C(17)-F(3A)   | 1.283(12) |
| C(17)-F(1A)   | 1.292(13) |
| C(17)-F(3)    | 1.296(11) |
| C(17)-F(2)    | 1.412(10) |
| C(17)-F(2A)   | 1.415(12) |
| C(14)-C(15)   | 1.379(12) |
| C(15)-C(16)   | 1.368(11) |
| C(15)-C(18)   | 1.461(11) |
| C(18)-F(4A)   | 1.308(13) |
| C(18)-F(4)    | 1.309(9)  |
| C(18)-F(5A)   | 1.314(12) |
| C(18)-F(6)    | 1.324(10) |
| C(18)-F(5)    | 1.327(10) |
| C(18)-F(6A)   | 1.342(12) |
| N(2)-C(215)   | 1.427(9)  |
| N(2)-C(3)     | 1.463(9)  |
| C(215)-C(216) | 1.377(9)  |
| C(215)-C(220) | 1.384(9)  |
| C(216)-C(217) | 1.397(9)  |
| C(217)-C(218) | 1.366(9)  |
| C(217)-C(221) | 1.489(9)  |

|               |           |
|---------------|-----------|
| C(218)-C(219) | 1.377(9)  |
| C(219)-C(220) | 1.396(9)  |
| C(219)-C(236) | 1.487(10) |
| C(221)-C(222) | 1.378(9)  |
| C(221)-C(226) | 1.389(9)  |
| C(222)-C(223) | 1.374(10) |
| C(222)-C(227) | 1.515(10) |
| C(223)-C(224) | 1.384(11) |
| C(224)-C(225) | 1.376(11) |
| C(224)-C(230) | 1.500(12) |
| C(225)-C(226) | 1.370(10) |
| C(226)-C(233) | 1.502(11) |
| C(227)-C(29B) | 1.50(2)   |
| C(227)-C(228) | 1.518(11) |
| C(227)-C(229) | 1.520(11) |
| C(227)-C(28B) | 1.52(2)   |
| C(230)-C(232) | 1.400(14) |
| C(230)-C(32B) | 1.419(19) |
| C(230)-C(231) | 1.473(14) |
| C(230)-C(31B) | 1.495(19) |
| C(233)-C(34B) | 1.534(19) |
| C(233)-C(234) | 1.537(11) |
| C(233)-C(235) | 1.546(11) |
| C(233)-C(35B) | 1.547(19) |
| C(236)-C(241) | 1.379(9)  |
| C(236)-C(237) | 1.382(9)  |
| C(237)-C(238) | 1.373(9)  |
| C(237)-C(242) | 1.521(10) |
| C(238)-C(239) | 1.366(10) |
| C(239)-C(240) | 1.380(10) |
| C(239)-C(245) | 1.515(10) |
| C(240)-C(241) | 1.397(9)  |
| C(241)-C(248) | 1.515(10) |
| C(242)-C(243) | 1.493(10) |
| C(242)-C(244) | 1.505(11) |
| C(245)-C(246) | 1.453(14) |

|               |           |
|---------------|-----------|
| C(245)-C(46B) | 1.467(19) |
| C(245)-C(247) | 1.506(14) |
| C(245)-C(47B) | 1.511(19) |
| C(248)-C(50B) | 1.509(19) |
| C(248)-C(249) | 1.511(12) |
| C(248)-C(250) | 1.514(13) |
| C(248)-C(49B) | 1.516(19) |
| N(3)-C(15C)   | 1.418(12) |
| N(3)-C(315)   | 1.422(10) |
| N(3)-C(5)     | 1.496(9)  |
| C(315)-C(316) | 1.391(11) |
| C(315)-C(320) | 1.396(11) |
| C(316)-C(317) | 1.392(11) |
| C(317)-C(318) | 1.380(11) |
| C(317)-C(321) | 1.488(12) |
| C(318)-C(319) | 1.391(12) |
| C(319)-C(320) | 1.373(11) |
| C(319)-C(336) | 1.484(12) |
| C(321)-C(322) | 1.386(13) |
| C(321)-C(326) | 1.394(13) |
| C(322)-C(323) | 1.384(13) |
| C(322)-C(327) | 1.515(14) |
| C(323)-C(324) | 1.374(14) |
| C(324)-C(325) | 1.384(15) |
| C(324)-C(330) | 1.535(17) |
| C(325)-C(326) | 1.356(13) |
| C(326)-C(333) | 1.510(16) |
| C(327)-C(329) | 1.487(14) |
| C(327)-C(328) | 1.529(15) |
| C(330)-C(332) | 1.423(17) |
| C(330)-C(331) | 1.500(16) |
| C(333)-C(334) | 1.524(14) |
| C(333)-C(335) | 1.538(14) |
| C(336)-C(341) | 1.379(11) |
| C(336)-C(337) | 1.396(11) |
| C(337)-C(338) | 1.374(11) |

|               |           |
|---------------|-----------|
| C(337)-C(342) | 1.522(11) |
| C(338)-C(339) | 1.361(12) |
| C(339)-C(340) | 1.384(12) |
| C(339)-C(345) | 1.517(11) |
| C(340)-C(341) | 1.397(12) |
| C(341)-C(348) | 1.527(13) |
| C(342)-C(343) | 1.499(14) |
| C(342)-C(344) | 1.530(14) |
| C(345)-C(346) | 1.490(16) |
| C(345)-C(347) | 1.534(15) |
| C(348)-C(350) | 1.492(15) |
| C(348)-C(349) | 1.523(15) |
| C(15C)-C(16C) | 1.380(15) |
| C(15C)-C(20C) | 1.385(15) |
| C(16C)-C(17C) | 1.401(15) |
| C(17C)-C(18C) | 1.369(15) |
| C(17C)-C(21C) | 1.484(15) |
| C(18C)-C(19C) | 1.389(15) |
| C(19C)-C(20C) | 1.373(15) |
| C(19C)-C(36C) | 1.479(15) |
| C(21C)-C(22C) | 1.374(16) |
| C(21C)-C(26C) | 1.391(16) |
| C(22C)-C(23C) | 1.386(16) |
| C(22C)-C(27C) | 1.514(17) |
| C(23C)-C(24C) | 1.376(17) |
| C(24C)-C(25C) | 1.373(18) |
| C(24C)-C(30C) | 1.53(2)   |
| C(25C)-C(26C) | 1.365(16) |
| C(26C)-C(33C) | 1.50(2)   |
| C(27C)-C(29C) | 1.487(18) |
| C(27C)-C(28C) | 1.514(18) |
| C(30C)-C(32C) | 1.42(2)   |
| C(30C)-C(31C) | 1.51(2)   |
| C(33C)-C(34C) | 1.529(17) |
| C(33C)-C(35C) | 1.545(17) |
| C(36C)-C(41C) | 1.378(15) |

|                   |            |
|-------------------|------------|
| C(36C)-C(37C)     | 1.391(15)  |
| C(37C)-C(38C)     | 1.368(15)  |
| C(37C)-C(42C)     | 1.524(15)  |
| C(38C)-C(39C)     | 1.367(15)  |
| C(39C)-C(40C)     | 1.384(15)  |
| C(39C)-C(45C)     | 1.514(15)  |
| C(40C)-C(41C)     | 1.398(15)  |
| C(41C)-C(48C)     | 1.526(17)  |
| C(42C)-C(43C)     | 1.500(18)  |
| C(42C)-C(44C)     | 1.522(18)  |
| C(45C)-C(46C)     | 1.48(2)    |
| C(45C)-C(47C)     | 1.52(2)    |
| C(48C)-C(50C)     | 1.510(19)  |
| C(48C)-C(49C)     | 1.514(18)  |
| C(1)-C(2)         | 1.493(11)  |
| C(2)-N(4)         | 1.472(9)   |
| C(3)-C(4)         | 1.488(10)  |
| C(4)-N(4)         | 1.487(9)   |
| C(5)-C(6)         | 1.491(11)  |
| C(6)-N(4)         | 1.480(9)   |
| N(3)-Mo(1)-N(2)   | 120.2(3)   |
| N(3)-Mo(1)-N(1)   | 117.1(3)   |
| N(2)-Mo(1)-N(1)   | 114.5(3)   |
| N(3)-Mo(1)-N(4)   | 79.9(2)    |
| N(2)-Mo(1)-N(4)   | 80.9(2)    |
| N(1)-Mo(1)-N(4)   | 80.3(2)    |
| N(3)-Mo(1)-Cl(1)  | 96.47(19)  |
| N(2)-Mo(1)-Cl(1)  | 102.32(17) |
| N(1)-Mo(1)-Cl(1)  | 100.20(18) |
| N(4)-Mo(1)-Cl(1)  | 176.10(17) |
| C(11)-N(1)-C(1)   | 114.3(6)   |
| C(11)-N(1)-Mo(1)  | 130.1(5)   |
| C(1)-N(1)-Mo(1)   | 115.0(5)   |
| N(1)-C(11)-C(16)  | 124.1(7)   |
| N(1)-C(11)-C(12)  | 121.0(7)   |
| C(16)-C(11)-C(12) | 114.9(8)   |

|                   |           |
|-------------------|-----------|
| C(13)-C(12)-C(11) | 122.8(8)  |
| C(12)-C(13)-C(14) | 120.8(8)  |
| C(12)-C(13)-C(17) | 120.2(8)  |
| C(14)-C(13)-C(17) | 119.0(8)  |
| F(1)-C(17)-F(3A)  | 50.8(10)  |
| F(1)-C(17)-F(1A)  | 118.6(17) |
| F(3A)-C(17)-F(1A) | 116.6(16) |
| F(1)-C(17)-F(3)   | 110.2(11) |
| F(3A)-C(17)-F(3)  | 124.2(13) |
| F(1A)-C(17)-F(3)  | 16.8(19)  |
| F(1)-C(17)-F(2)   | 100.4(9)  |
| F(3A)-C(17)-F(2)  | 51.2(11)  |
| F(1A)-C(17)-F(2)  | 83.8(15)  |
| F(3)-C(17)-F(2)   | 99.7(10)  |
| F(1)-C(17)-F(2A)  | 44.3(8)   |
| F(3A)-C(17)-F(2A) | 94.9(12)  |
| F(1A)-C(17)-F(2A) | 98.5(15)  |
| F(3)-C(17)-F(2A)  | 82.8(12)  |
| F(2)-C(17)-F(2A)  | 140.7(11) |
| F(1)-C(17)-C(13)  | 117.8(9)  |
| F(3A)-C(17)-C(13) | 118.5(10) |
| F(1A)-C(17)-C(13) | 117.5(15) |
| F(3)-C(17)-C(13)  | 116.0(10) |
| F(2)-C(17)-C(13)  | 109.9(8)  |
| F(2A)-C(17)-C(13) | 103.7(10) |
| C(13)-C(14)-C(15) | 118.1(8)  |
| C(16)-C(15)-C(14) | 121.1(8)  |
| C(16)-C(15)-C(18) | 119.4(7)  |
| C(14)-C(15)-C(18) | 119.6(8)  |
| F(4A)-C(18)-F(4)  | 119.3(14) |
| F(4A)-C(18)-F(5A) | 106.5(14) |
| F(4)-C(18)-F(5A)  | 72.3(14)  |
| F(4A)-C(18)-F(6)  | 75.1(14)  |
| F(4)-C(18)-F(6)   | 105.7(8)  |
| F(5A)-C(18)-F(6)  | 37.7(13)  |
| F(4A)-C(18)-F(5)  | 28.9(14)  |

|                      |           |
|----------------------|-----------|
| F(4)-C(18)-F(5)      | 106.1(9)  |
| F(5A)-C(18)-F(5)     | 129.7(13) |
| F(6)-C(18)-F(5)      | 103.4(9)  |
| F(4A)-C(18)-F(6A)    | 102.4(14) |
| F(4)-C(18)-F(6A)     | 32.4(12)  |
| F(5A)-C(18)-F(6A)    | 103.6(13) |
| F(6)-C(18)-F(6A)     | 131.1(13) |
| F(5)-C(18)-F(6A)     | 79.7(15)  |
| F(4A)-C(18)-C(15)    | 118.0(12) |
| F(4)-C(18)-C(15)     | 116.5(8)  |
| F(5A)-C(18)-C(15)    | 114.3(12) |
| F(6)-C(18)-C(15)     | 113.3(8)  |
| F(5)-C(18)-C(15)     | 110.8(8)  |
| F(6A)-C(18)-C(15)    | 110.6(12) |
| C(15)-C(16)-C(11)    | 122.4(8)  |
| C(215)-N(2)-C(3)     | 114.1(6)  |
| C(215)-N(2)-Mo(1)    | 127.7(5)  |
| C(3)-N(2)-Mo(1)      | 115.7(4)  |
| C(216)-C(215)-C(220) | 119.6(6)  |
| C(216)-C(215)-N(2)   | 120.8(6)  |
| C(220)-C(215)-N(2)   | 119.6(7)  |
| C(215)-C(216)-C(217) | 121.0(7)  |
| C(218)-C(217)-C(216) | 117.5(7)  |
| C(218)-C(217)-C(221) | 121.0(6)  |
| C(216)-C(217)-C(221) | 121.5(6)  |
| C(217)-C(218)-C(219) | 123.9(6)  |
| C(218)-C(219)-C(220) | 117.1(7)  |
| C(218)-C(219)-C(236) | 118.8(6)  |
| C(220)-C(219)-C(236) | 124.1(7)  |
| C(215)-C(220)-C(219) | 120.9(7)  |
| C(222)-C(221)-C(226) | 120.3(7)  |
| C(222)-C(221)-C(217) | 120.1(7)  |
| C(226)-C(221)-C(217) | 119.4(7)  |
| C(223)-C(222)-C(221) | 119.0(7)  |
| C(223)-C(222)-C(227) | 118.0(7)  |
| C(221)-C(222)-C(227) | 122.9(7)  |



|                      |           |
|----------------------|-----------|
| C(222)-C(223)-C(224) | 122.5(8)  |
| C(225)-C(224)-C(223) | 116.5(8)  |
| C(225)-C(224)-C(230) | 123.0(8)  |
| C(223)-C(224)-C(230) | 120.5(8)  |
| C(226)-C(225)-C(224) | 123.1(8)  |
| C(225)-C(226)-C(221) | 118.5(7)  |
| C(225)-C(226)-C(233) | 119.5(7)  |
| C(221)-C(226)-C(233) | 122.0(7)  |
| C(29B)-C(227)-C(222) | 132(10)   |
| C(29B)-C(227)-C(228) | 100(10)   |
| C(222)-C(227)-C(228) | 112.8(7)  |
| C(29B)-C(227)-C(229) | 23(10)    |
| C(222)-C(227)-C(229) | 109.7(10) |
| C(228)-C(227)-C(229) | 110.8(8)  |
| C(29B)-C(227)-C(28B) | 112(3)    |
| C(222)-C(227)-C(28B) | 113(9)    |
| C(228)-C(227)-C(28B) | 27(10)    |
| C(229)-C(227)-C(28B) | 130(10)   |
| C(232)-C(230)-C(32B) | 39(4)     |
| C(232)-C(230)-C(231) | 118.6(13) |
| C(32B)-C(230)-C(231) | 135(3)    |
| C(232)-C(230)-C(31B) | 97(3)     |
| C(32B)-C(230)-C(31B) | 118(2)    |
| C(231)-C(230)-C(31B) | 21(3)     |
| C(232)-C(230)-C(224) | 112.0(11) |
| C(32B)-C(230)-C(224) | 113(2)    |
| C(231)-C(230)-C(224) | 112.3(13) |
| C(31B)-C(230)-C(224) | 126(3)    |
| C(226)-C(233)-C(34B) | 115(6)    |
| C(226)-C(233)-C(234) | 111.0(8)  |
| C(34B)-C(233)-C(234) | 26(6)     |
| C(226)-C(233)-C(235) | 112.5(8)  |
| C(34B)-C(233)-C(235) | 86(6)     |
| C(234)-C(233)-C(235) | 110.6(8)  |
| C(226)-C(233)-C(35B) | 107(6)    |
| C(34B)-C(233)-C(35B) | 109(2)    |

|                      |           |
|----------------------|-----------|
| C(234)-C(233)-C(35B) | 132(6)    |
| C(235)-C(233)-C(35B) | 25(7)     |
| C(241)-C(236)-C(237) | 121.5(7)  |
| C(241)-C(236)-C(219) | 118.4(6)  |
| C(237)-C(236)-C(219) | 119.9(6)  |
| C(238)-C(237)-C(236) | 118.0(7)  |
| C(238)-C(237)-C(242) | 119.9(7)  |
| C(236)-C(237)-C(242) | 122.1(7)  |
| C(239)-C(238)-C(237) | 123.1(7)  |
| C(238)-C(239)-C(240) | 117.7(7)  |
| C(238)-C(239)-C(245) | 122.2(8)  |
| C(240)-C(239)-C(245) | 120.1(8)  |
| C(239)-C(240)-C(241) | 121.6(7)  |
| C(236)-C(241)-C(240) | 118.0(7)  |
| C(236)-C(241)-C(248) | 122.7(7)  |
| C(240)-C(241)-C(248) | 119.3(7)  |
| C(243)-C(242)-C(244) | 109.1(7)  |
| C(243)-C(242)-C(237) | 112.6(7)  |
| C(244)-C(242)-C(237) | 115.1(7)  |
| C(246)-C(245)-C(46B) | 56(2)     |
| C(246)-C(245)-C(247) | 113.1(11) |
| C(46B)-C(245)-C(247) | 135.1(19) |
| C(246)-C(245)-C(47B) | 133(2)    |
| C(46B)-C(245)-C(47B) | 111(2)    |
| C(247)-C(245)-C(47B) | 39.7(18)  |
| C(246)-C(245)-C(239) | 113.8(10) |
| C(46B)-C(245)-C(239) | 110.6(19) |
| C(247)-C(245)-C(239) | 112.8(10) |
| C(47B)-C(245)-C(239) | 113.1(19) |
| C(50B)-C(248)-C(249) | 124(6)    |
| C(50B)-C(248)-C(250) | 14(6)     |
| C(249)-C(248)-C(250) | 110.5(9)  |
| C(50B)-C(248)-C(241) | 106(9)    |
| C(249)-C(248)-C(241) | 114.9(10) |
| C(250)-C(248)-C(241) | 112.9(16) |
| C(50B)-C(248)-C(49B) | 111(3)    |

|                      |           |
|----------------------|-----------|
| C(249)-C(248)-C(49B) | 21(5)     |
| C(250)-C(248)-C(49B) | 97(6)     |
| C(241)-C(248)-C(49B) | 109(5)    |
| C(15C)-N(3)-C(315)   | 6.0(19)   |
| C(15C)-N(3)-C(5)     | 116(3)    |
| C(315)-N(3)-C(5)     | 112.8(12) |
| C(15C)-N(3)-Mo(1)    | 126(3)    |
| C(315)-N(3)-Mo(1)    | 128.5(12) |
| C(5)-N(3)-Mo(1)      | 117.6(5)  |
| C(316)-C(315)-C(320) | 119.3(10) |
| C(316)-C(315)-N(3)   | 123.7(11) |
| C(320)-C(315)-N(3)   | 116.8(11) |
| C(315)-C(316)-C(317) | 120.3(10) |
| C(318)-C(317)-C(316) | 118.2(10) |
| C(318)-C(317)-C(321) | 120.1(10) |
| C(316)-C(317)-C(321) | 121.7(10) |
| C(317)-C(318)-C(319) | 123.3(11) |
| C(320)-C(319)-C(318) | 117.2(10) |
| C(320)-C(319)-C(336) | 123.4(10) |
| C(318)-C(319)-C(336) | 119.4(10) |
| C(319)-C(320)-C(315) | 121.8(11) |
| C(322)-C(321)-C(326) | 119.3(10) |
| C(322)-C(321)-C(317) | 119.7(10) |
| C(326)-C(321)-C(317) | 120.9(10) |
| C(323)-C(322)-C(321) | 119.4(10) |
| C(323)-C(322)-C(327) | 118.4(10) |
| C(321)-C(322)-C(327) | 122.1(10) |
| C(324)-C(323)-C(322) | 121.4(12) |
| C(323)-C(324)-C(325) | 118.0(11) |
| C(323)-C(324)-C(330) | 122.4(13) |
| C(325)-C(324)-C(330) | 119.6(12) |
| C(326)-C(325)-C(324) | 122.1(12) |
| C(325)-C(326)-C(321) | 119.6(11) |
| C(325)-C(326)-C(333) | 118.3(11) |
| C(321)-C(326)-C(333) | 121.9(10) |
| C(329)-C(327)-C(322) | 111.7(11) |

|                      |           |
|----------------------|-----------|
| C(329)-C(327)-C(328) | 110.9(12) |
| C(322)-C(327)-C(328) | 111.5(11) |
| C(332)-C(330)-C(331) | 120.3(15) |
| C(332)-C(330)-C(324) | 110.1(13) |
| C(331)-C(330)-C(324) | 112.4(13) |
| C(326)-C(333)-C(334) | 109.3(12) |
| C(326)-C(333)-C(335) | 111.4(12) |
| C(334)-C(333)-C(335) | 109.3(12) |
| C(341)-C(336)-C(337) | 120.4(9)  |
| C(341)-C(336)-C(319) | 118.2(10) |
| C(337)-C(336)-C(319) | 121.0(10) |
| C(338)-C(337)-C(336) | 118.5(10) |
| C(338)-C(337)-C(342) | 120.3(10) |
| C(336)-C(337)-C(342) | 121.2(10) |
| C(339)-C(338)-C(337) | 122.7(10) |
| C(338)-C(339)-C(340) | 118.3(10) |
| C(338)-C(339)-C(345) | 122.6(11) |
| C(340)-C(339)-C(345) | 119.1(10) |
| C(339)-C(340)-C(341) | 121.1(11) |
| C(336)-C(341)-C(340) | 118.8(10) |
| C(336)-C(341)-C(348) | 123.6(10) |
| C(340)-C(341)-C(348) | 117.5(10) |
| C(343)-C(342)-C(337) | 111.0(11) |
| C(343)-C(342)-C(344) | 110.0(10) |
| C(337)-C(342)-C(344) | 113.9(11) |
| C(346)-C(345)-C(339) | 111.7(13) |
| C(346)-C(345)-C(347) | 111.2(12) |
| C(339)-C(345)-C(347) | 111.4(14) |
| C(350)-C(348)-C(349) | 111.0(12) |
| C(350)-C(348)-C(341) | 110.7(14) |
| C(349)-C(348)-C(341) | 111.7(13) |
| C(16C)-C(15C)-C(20C) | 120.7(17) |
| C(16C)-C(15C)-N(3)   | 116(2)    |
| C(20C)-C(15C)-N(3)   | 123(2)    |
| C(15C)-C(16C)-C(17C) | 120.0(17) |
| C(18C)-C(17C)-C(16C) | 117.8(16) |

|                      |           |
|----------------------|-----------|
| C(18C)-C(17C)-C(21C) | 125.4(17) |
| C(16C)-C(17C)-C(21C) | 116.8(16) |
| C(17C)-C(18C)-C(19C) | 122.9(18) |
| C(20C)-C(19C)-C(18C) | 118.3(16) |
| C(20C)-C(19C)-C(36C) | 121.9(17) |
| C(18C)-C(19C)-C(36C) | 119.5(16) |
| C(19C)-C(20C)-C(15C) | 120.1(17) |
| C(22C)-C(21C)-C(26C) | 119.7(15) |
| C(22C)-C(21C)-C(17C) | 118.2(15) |
| C(26C)-C(21C)-C(17C) | 121.6(15) |
| C(21C)-C(22C)-C(23C) | 119.7(15) |
| C(21C)-C(22C)-C(27C) | 122.1(16) |
| C(23C)-C(22C)-C(27C) | 118.1(16) |
| C(24C)-C(23C)-C(22C) | 120.5(17) |
| C(25C)-C(24C)-C(23C) | 119.1(17) |
| C(25C)-C(24C)-C(30C) | 122.3(18) |
| C(23C)-C(24C)-C(30C) | 118.2(18) |
| C(26C)-C(25C)-C(24C) | 121.2(18) |
| C(25C)-C(26C)-C(21C) | 119.7(17) |
| C(25C)-C(26C)-C(33C) | 118.4(17) |
| C(21C)-C(26C)-C(33C) | 121.9(17) |
| C(29C)-C(27C)-C(22C) | 112.8(18) |
| C(29C)-C(27C)-C(28C) | 114(2)    |
| C(22C)-C(27C)-C(28C) | 113.7(18) |
| C(32C)-C(30C)-C(31C) | 117(2)    |
| C(32C)-C(30C)-C(24C) | 112(2)    |
| C(31C)-C(30C)-C(24C) | 110(2)    |
| C(26C)-C(33C)-C(34C) | 111(2)    |
| C(26C)-C(33C)-C(35C) | 110(2)    |
| C(34C)-C(33C)-C(35C) | 110(2)    |
| C(41C)-C(36C)-C(37C) | 122.1(15) |
| C(41C)-C(36C)-C(19C) | 118.7(17) |
| C(37C)-C(36C)-C(19C) | 118.8(17) |
| C(38C)-C(37C)-C(36C) | 118.5(16) |
| C(38C)-C(37C)-C(42C) | 121.3(17) |
| C(36C)-C(37C)-C(42C) | 120.2(17) |

|                      |           |
|----------------------|-----------|
| C(39C)-C(38C)-C(37C) | 121.9(17) |
| C(38C)-C(39C)-C(40C) | 118.7(16) |
| C(38C)-C(39C)-C(45C) | 120.7(18) |
| C(40C)-C(39C)-C(45C) | 120.6(18) |
| C(39C)-C(40C)-C(41C) | 121.7(17) |
| C(36C)-C(41C)-C(40C) | 117.1(16) |
| C(36C)-C(41C)-C(48C) | 123.7(18) |
| C(40C)-C(41C)-C(48C) | 119.1(17) |
| C(43C)-C(42C)-C(44C) | 110.5(19) |
| C(43C)-C(42C)-C(37C) | 112(2)    |
| C(44C)-C(42C)-C(37C) | 113(2)    |
| C(46C)-C(45C)-C(39C) | 113(3)    |
| C(46C)-C(45C)-C(47C) | 111(2)    |
| C(39C)-C(45C)-C(47C) | 113(2)    |
| C(50C)-C(48C)-C(49C) | 112(2)    |
| C(50C)-C(48C)-C(41C) | 110(2)    |
| C(49C)-C(48C)-C(41C) | 113(2)    |
| N(1)-C(1)-C(2)       | 107.2(6)  |
| N(4)-C(2)-C(1)       | 110.0(7)  |
| N(2)-C(3)-C(4)       | 109.0(6)  |
| N(4)-C(4)-C(3)       | 109.4(6)  |
| C(6)-C(5)-N(3)       | 106.4(7)  |
| N(4)-C(6)-C(5)       | 110.1(6)  |
| C(2)-N(4)-C(6)       | 111.9(6)  |
| C(2)-N(4)-C(4)       | 111.8(6)  |
| C(6)-N(4)-C(4)       | 111.2(6)  |
| C(2)-N(4)-Mo(1)      | 107.0(4)  |
| C(6)-N(4)-Mo(1)      | 108.1(4)  |
| C(4)-N(4)-Mo(1)      | 106.6(4)  |

---

**Table 4. Anisotropic displacement parameters ( $\text{\AA}^2 \times 10^3$ ) for 04072. The anisotropic displacement factor exponent takes the form:  $-2p^2[ h^2 a^{*2}U^{11} + \dots + 2 h k a^* b^* U^{12} ]$**

|        | U <sup>11</sup> | U <sup>22</sup> | U <sup>33</sup> | U <sup>23</sup> | U <sup>13</sup> | U <sup>12</sup> |
|--------|-----------------|-----------------|-----------------|-----------------|-----------------|-----------------|
| Cl(1)  | 87(2)           | 33(1)           | 53(1)           | 6(1)            | -15(1)          | -3(1)           |
| Mo(1)  | 59(1)           | 21(1)           | 35(1)           | 1(1)            | -4(1)           | -1(1)           |
| N(1)   | 73(4)           | 23(3)           | 42(3)           | 9(3)            | -1(3)           | 2(3)            |
| C(11)  | 72(6)           | 34(4)           | 37(4)           | -1(3)           | -6(4)           | 3(4)            |
| C(12)  | 88(7)           | 40(4)           | 46(5)           | 5(4)            | -2(5)           | -12(4)          |
| C(13)  | 113(8)          | 49(4)           | 44(5)           | 5(3)            | -1(5)           | -12(5)          |
| C(17)  | 148(8)          | 64(5)           | 61(6)           | 12(4)           | 4(6)            | -18(7)          |
| F(1)   | 176(9)          | 66(5)           | 105(7)          | 28(5)           | 45(7)           | -12(6)          |
| F(2)   | 158(7)          | 55(5)           | 82(6)           | 13(4)           | -10(5)          | -17(5)          |
| F(3)   | 176(10)         | 38(4)           | 68(4)           | 6(3)            | -17(5)          | -33(6)          |
| F(1A)  | 176(9)          | 66(5)           | 105(7)          | 28(5)           | 45(7)           | -12(6)          |
| F(2A)  | 158(7)          | 55(5)           | 82(6)           | 13(4)           | -10(5)          | -17(5)          |
| F(3A)  | 176(10)         | 38(4)           | 68(4)           | 6(3)            | -17(5)          | -33(6)          |
| C(14)  | 79(6)           | 61(5)           | 48(5)           | 5(4)            | 8(5)            | -12(5)          |
| C(15)  | 80(7)           | 52(4)           | 43(4)           | 2(4)            | 3(4)            | 1(4)            |
| C(18)  | 102(7)          | 65(5)           | 45(5)           | 1(4)            | 8(5)            | 1(5)            |
| F(4)   | 153(8)          | 78(5)           | 50(4)           | -8(4)           | 19(5)           | 7(5)            |
| F(5)   | 112(6)          | 84(6)           | 89(6)           | -28(5)          | -5(5)           | 24(4)           |
| F(6)   | 121(6)          | 88(6)           | 82(6)           | -38(5)          | 26(5)           | -20(5)          |
| F(4A)  | 153(8)          | 78(5)           | 50(4)           | -8(4)           | 19(5)           | 7(5)            |
| F(5A)  | 112(6)          | 84(6)           | 89(6)           | -28(5)          | -5(5)           | 24(4)           |
| F(6A)  | 121(6)          | 88(6)           | 82(6)           | -38(5)          | 26(5)           | -20(5)          |
| C(16)  | 80(6)           | 33(4)           | 43(4)           | 1(3)            | 5(4)            | -1(4)           |
| N(2)   | 62(4)           | 25(3)           | 29(3)           | 3(3)            | -7(3)           | -3(3)           |
| C(215) | 62(5)           | 21(3)           | 31(4)           | -4(3)           | -4(4)           | 3(3)            |
| C(216) | 57(5)           | 19(3)           | 37(4)           | 5(3)            | -1(4)           | 8(3)            |
| C(217) | 52(4)           | 23(4)           | 33(4)           | 6(3)            | 4(4)            | 1(3)            |
| C(218) | 58(4)           | 21(4)           | 32(4)           | -3(3)           | 1(4)            | -1(3)           |
| C(219) | 54(4)           | 25(4)           | 22(4)           | -3(3)           | -2(4)           | 2(3)            |
| C(220) | 50(4)           | 31(4)           | 28(4)           | 0(3)            | -1(4)           | -2(3)           |
| C(221) | 56(4)           | 19(4)           | 45(4)           | -1(3)           | -1(4)           | 4(3)            |

|        |         |         |         |         |         |         |
|--------|---------|---------|---------|---------|---------|---------|
| C(222) | 58(5)   | 34(5)   | 45(4)   | 1(3)    | 6(4)    | -2(4)   |
| C(223) | 67(6)   | 42(5)   | 57(5)   | -2(4)   | 7(4)    | -6(4)   |
| C(224) | 66(5)   | 45(5)   | 69(5)   | -9(4)   | -1(4)   | -15(4)  |
| C(225) | 72(6)   | 42(5)   | 49(5)   | -13(4)  | -4(4)   | -11(4)  |
| C(226) | 57(5)   | 31(4)   | 47(4)   | -5(4)   | 3(4)    | -5(4)   |
| C(227) | 69(6)   | 48(5)   | 44(4)   | 2(4)    | 8(4)    | -6(4)   |
| C(228) | 94(13)  | 66(6)   | 52(6)   | 15(5)   | 9(7)    | 6(6)    |
| C(229) | 113(11) | 63(6)   | 49(8)   | -19(6)  | 3(8)    | 16(7)   |
| C(28B) | 100(60) | 60(40)  | 40(40)  | 20(40)  | 10(50)  | 0(40)   |
| C(29B) | 90(60)  | 50(50)  | 40(30)  | 0(40)   | 10(40)  | -20(40) |
| C(230) | 69(6)   | 70(7)   | 96(7)   | -13(5)  | 0(5)    | -21(4)  |
| C(231) | 65(16)  | 79(12)  | 146(17) | -42(12) | -53(11) | -7(9)   |
| C(232) | 85(9)   | 73(11)  | 140(20) | -14(12) | -32(12) | -1(7)   |
| C(31B) | 30(30)  | 90(30)  | 80(20)  | -10(20) | -20(20) | 0(20)   |
| C(32B) | 49(15)  | 110(40) | 170(40) | -80(30) | -30(30) | 0(20)   |
| C(233) | 61(6)   | 45(5)   | 39(4)   | -8(3)   | -1(4)   | -3(4)   |
| C(234) | 80(9)   | 64(8)   | 53(9)   | 11(7)   | 6(7)    | -1(7)   |
| C(235) | 90(11)  | 81(8)   | 46(7)   | -18(7)  | 8(7)    | 2(8)    |
| C(34B) | 90(50)  | 70(40)  | 40(40)  | 0(30)   | -20(30) | -30(40) |
| C(35B) | 110(50) | 60(40)  | 40(40)  | -40(30) | 10(30)  | -10(30) |
| C(236) | 48(5)   | 20(4)   | 44(4)   | 1(3)    | -1(4)   | -1(3)   |
| C(237) | 66(6)   | 23(4)   | 52(4)   | -1(3)   | 6(4)    | 3(4)    |
| C(238) | 65(6)   | 35(5)   | 57(4)   | -6(4)   | 5(4)    | 6(4)    |
| C(239) | 63(5)   | 29(4)   | 68(5)   | -2(4)   | -6(5)   | 7(4)    |
| C(240) | 73(6)   | 36(5)   | 44(5)   | -1(4)   | -9(4)   | 2(4)    |
| C(241) | 62(5)   | 23(4)   | 44(4)   | 3(3)    | -4(4)   | -2(3)   |
| C(242) | 71(6)   | 35(5)   | 50(4)   | -4(4)   | 7(4)    | 13(4)   |
| C(243) | 95(7)   | 100(8)  | 61(6)   | 11(6)   | 19(6)   | -12(6)  |
| C(244) | 125(9)  | 86(8)   | 46(6)   | 2(5)    | 0(6)    | -29(6)  |
| C(245) | 86(7)   | 58(5)   | 90(7)   | 3(5)    | -11(6)  | 32(5)   |
| C(246) | 78(8)   | 101(12) | 152(18) | 1(13)   | -13(11) | 40(7)   |
| C(247) | 132(13) | 33(6)   | 140(18) | 10(10)  | 7(14)   | 32(7)   |
| C(46B) | 120(30) | 110(30) | 150(40) | -10(30) | -60(20) | 56(18)  |
| C(47B) | 130(30) | 70(20)  | 120(40) | 40(20)  | 20(30)  | 56(16)  |
| C(248) | 76(6)   | 31(5)   | 44(4)   | 2(4)    | -4(4)   | 8(4)    |
| C(249) | 99(7)   | 43(14)  | 52(6)   | -11(7)  | -13(5)  | 10(7)   |



|        |         |         |         |         |        |        |
|--------|---------|---------|---------|---------|--------|--------|
| C(250) | 110(11) | 59(10)  | 80(13)  | -17(12) | 32(9)  | -8(9)  |
| C(49B) | 99(7)   | 43(14)  | 52(6)   | -11(7)  | -13(5) | 10(7)  |
| C(50B) | 70(20)  | 70(40)  | 60(40)  | 0(40)   | 12(13) | 10(20) |
| N(3)   | 59(3)   | 33(4)   | 42(4)   | 2(3)    | -4(3)  | 4(3)   |
| C(315) | 57(3)   | 31(4)   | 42(4)   | 0(4)    | 2(3)   | -4(3)  |
| C(316) | 56(4)   | 44(5)   | 35(4)   | 2(4)    | 3(3)   | -2(3)  |
| C(317) | 57(3)   | 48(4)   | 47(3)   | -2(3)   | -1(3)  | 0(3)   |
| C(318) | 58(4)   | 45(5)   | 45(3)   | -1(3)   | -4(3)  | -3(4)  |
| C(319) | 62(4)   | 39(4)   | 44(3)   | -4(3)   | -3(3)  | -6(3)  |
| C(320) | 58(4)   | 36(4)   | 41(4)   | -1(4)   | 3(3)   | -4(4)  |
| C(321) | 60(3)   | 60(4)   | 59(4)   | -7(4)   | 4(3)   | 5(3)   |
| C(322) | 64(4)   | 61(4)   | 71(5)   | -14(4)  | 5(4)   | 7(3)   |
| C(323) | 67(5)   | 70(5)   | 77(6)   | -15(5)  | 2(4)   | 13(4)  |
| C(324) | 69(4)   | 85(5)   | 80(5)   | -12(5)  | 12(4)  | 16(4)  |
| C(325) | 67(4)   | 81(5)   | 77(5)   | 2(5)    | 13(4)  | 9(4)   |
| C(326) | 65(4)   | 69(4)   | 66(5)   | 4(4)    | 11(4)  | 4(4)   |
| C(327) | 70(5)   | 57(6)   | 87(7)   | -11(5)  | 6(5)   | 3(4)   |
| C(328) | 103(10) | 82(9)   | 104(10) | 13(7)   | 4(8)   | 2(7)   |
| C(329) | 91(8)   | 87(10)  | 109(10) | -15(8)  | -8(7)  | -15(7) |
| C(330) | 90(6)   | 115(6)  | 100(6)  | -19(6)  | 27(6)  | 30(6)  |
| C(331) | 108(11) | 114(8)  | 129(11) | -21(8)  | 37(10) | 46(9)  |
| C(332) | 114(11) | 150(11) | 108(7)  | -15(8)  | 41(8)  | 41(9)  |
| C(333) | 82(5)   | 69(5)   | 79(5)   | 11(5)   | 12(5)  | -1(4)  |
| C(334) | 144(10) | 100(9)  | 98(8)   | 37(8)   | 5(8)   | -5(10) |
| C(335) | 93(8)   | 82(8)   | 100(10) | 1(9)    | 8(8)   | -15(7) |
| C(336) | 68(4)   | 41(3)   | 44(3)   | -4(3)   | -7(3)  | -4(3)  |
| C(337) | 67(4)   | 38(3)   | 46(3)   | -4(3)   | -8(3)  | 0(3)   |
| C(338) | 70(5)   | 39(4)   | 47(3)   | -6(3)   | -9(4)  | 0(4)   |
| C(339) | 75(4)   | 44(4)   | 46(3)   | -4(3)   | -9(3)  | -1(3)  |
| C(340) | 81(5)   | 45(4)   | 44(3)   | -5(3)   | -4(4)  | -6(4)  |
| C(341) | 79(4)   | 45(3)   | 44(3)   | -2(3)   | -7(3)  | -9(3)  |
| C(342) | 66(6)   | 36(5)   | 52(4)   | 1(4)    | -9(5)  | 5(5)   |
| C(343) | 79(8)   | 41(9)   | 72(7)   | 12(7)   | 11(7)  | 14(6)  |
| C(344) | 71(11)  | 37(5)   | 82(9)   | -3(6)   | -3(8)  | 11(6)  |
| C(345) | 86(5)   | 45(4)   | 48(3)   | -3(3)   | -15(4) | 0(4)   |
| C(346) | 102(8)  | 60(10)  | 50(6)   | -16(8)  | -10(6) | 14(8)  |

|        |         |         |         |         |        |        |
|--------|---------|---------|---------|---------|--------|--------|
| C(347) | 88(9)   | 51(7)   | 57(7)   | 2(6)    | -16(7) | 3(7)   |
| C(348) | 91(6)   | 49(4)   | 54(5)   | -2(4)   | -9(4)  | -18(4) |
| C(349) | 94(7)   | 54(5)   | 74(7)   | 8(6)    | -5(6)  | -22(5) |
| C(350) | 108(9)  | 49(5)   | 84(10)  | -11(7)  | -19(8) | -10(7) |
| C(15C) | 57(4)   | 34(5)   | 40(4)   | 0(4)    | 2(4)   | -5(4)  |
| C(16C) | 57(4)   | 42(5)   | 39(4)   | 1(4)    | 2(3)   | -3(4)  |
| C(17C) | 58(3)   | 49(5)   | 47(4)   | -2(4)   | -1(3)  | 0(4)   |
| C(18C) | 59(4)   | 45(5)   | 46(4)   | 0(4)    | -4(3)  | -4(4)  |
| C(19C) | 62(4)   | 40(4)   | 44(3)   | -3(3)   | -3(3)  | -5(4)  |
| C(20C) | 59(4)   | 36(5)   | 41(4)   | -2(4)   | 1(4)   | -4(4)  |
| C(21C) | 62(4)   | 61(5)   | 59(4)   | -5(4)   | 5(4)   | 5(4)   |
| C(22C) | 65(4)   | 65(5)   | 69(5)   | -13(4)  | 4(4)   | 6(4)   |
| C(23C) | 68(5)   | 73(5)   | 76(6)   | -16(5)  | 5(5)   | 11(4)  |
| C(24C) | 72(5)   | 86(6)   | 82(6)   | -9(5)   | 14(5)  | 12(5)  |
| C(25C) | 68(5)   | 80(6)   | 76(6)   | 1(5)    | 13(5)  | 6(5)   |
| C(26C) | 69(4)   | 70(5)   | 71(5)   | 0(5)    | 11(4)  | 1(4)   |
| C(27C) | 71(6)   | 64(6)   | 79(7)   | -15(6)  | 5(5)   | 1(5)   |
| C(28C) | 88(11)  | 73(14)  | 91(13)  | -21(11) | -2(10) | -9(10) |
| C(29C) | 89(11)  | 81(11)  | 96(12)  | 6(8)    | 6(10)  | -3(9)  |
| C(30C) | 93(7)   | 113(7)  | 99(7)   | -16(6)  | 28(6)  | 25(7)  |
| C(31C) | 109(13) | 115(8)  | 116(12) | -29(8)  | 33(12) | 33(10) |
| C(32C) | 127(18) | 141(14) | 95(12)  | -10(11) | 39(13) | 15(17) |
| C(33C) | 86(6)   | 67(6)   | 77(7)   | 5(5)    | 12(6)  | -5(5)  |
| C(34C) | 127(14) | 78(10)  | 85(12)  | 17(10)  | 7(12)  | -7(13) |
| C(35C) | 86(12)  | 69(12)  | 65(13)  | -7(10)  | 18(10) | -5(10) |
| C(36C) | 69(4)   | 41(4)   | 45(3)   | -4(3)   | -6(3)  | -4(3)  |
| C(37C) | 68(5)   | 39(4)   | 47(3)   | -3(3)   | -8(4)  | -1(4)  |
| C(38C) | 70(5)   | 39(4)   | 47(3)   | -6(4)   | -9(4)  | 0(4)   |
| C(39C) | 77(5)   | 43(4)   | 46(3)   | -4(3)   | -9(4)  | -1(4)  |
| C(40C) | 79(5)   | 44(4)   | 45(4)   | -4(4)   | -5(4)  | -4(4)  |
| C(41C) | 79(5)   | 46(4)   | 45(3)   | -2(3)   | -7(4)  | -9(4)  |
| C(42C) | 68(6)   | 39(5)   | 52(5)   | 0(5)    | -6(5)  | 1(5)   |
| C(43C) | 72(12)  | 40(6)   | 66(11)  | -1(8)   | -5(11) | 5(9)   |
| C(44C) | 75(10)  | 48(14)  | 70(12)  | 15(13)  | 6(10)  | 12(10) |
| C(45C) | 84(6)   | 45(5)   | 48(4)   | -4(4)   | -13(4) | 1(5)   |
| C(46C) | 90(12)  | 49(9)   | 56(9)   | -1(8)   | -18(9) | 4(9)   |

|        |        |        |        |         |        |        |
|--------|--------|--------|--------|---------|--------|--------|
| C(47C) | 97(11) | 44(12) | 53(8)  | -15(10) | -10(9) | 2(10)  |
| C(48C) | 90(6)  | 50(5)  | 54(5)  | -2(4)   | -7(5)  | -17(4) |
| C(49C) | 94(7)  | 54(5)  | 74(7)  | 8(6)    | -5(6)  | -22(5) |
| C(50C) | 91(7)  | 50(12) | 75(13) | 15(12)  | -1(11) | -24(6) |
| C(1)   | 86(6)  | 26(4)  | 45(4)  | 0(3)    | 1(4)   | 5(4)   |
| C(2)   | 70(5)  | 22(4)  | 48(4)  | 9(3)    | -3(4)  | 8(4)   |
| C(3)   | 82(6)  | 21(4)  | 34(4)  | -1(3)   | -14(4) | 2(4)   |
| C(4)   | 84(6)  | 23(4)  | 38(4)  | -2(3)   | -13(4) | 6(4)   |
| C(5)   | 67(5)  | 48(5)  | 43(5)  | 13(4)   | -3(4)  | -10(4) |
| C(6)   | 75(5)  | 26(4)  | 42(5)  | 8(3)    | -5(4)  | -9(4)  |
| N(4)   | 57(4)  | 23(3)  | 36(3)  | 4(3)    | -2(3)  | -2(3)  |

---

**Table 5. Hydrogen coordinates ( x 10<sup>4</sup>) and isotropic displacement parameters (Å<sup>2</sup>x 10<sup>3</sup>) for 04072.**

|        | x    | y    | z     | U(eq) |
|--------|------|------|-------|-------|
| H(12)  | 2721 | 3003 | -375  | 70    |
| H(14)  | 3178 | 2499 | -2001 | 75    |
| H(16)  | 2756 | 1305 | -811  | 63    |
| H(216) | 3005 | 3534 | 1385  | 45    |
| H(218) | 2575 | 5130 | 1088  | 45    |
| H(220) | 1849 | 3754 | 1002  | 44    |
| H(223) | 3994 | 5271 | 789   | 66    |
| H(225) | 3766 | 5052 | 2593  | 65    |
| H(227) | 3127 | 4580 | 240   | 64    |
| H(27B) | 3150 | 4524 | 340   | 64    |
| H(22A) | 3325 | 5240 | -526  | 106   |
| H(22B) | 3649 | 5508 | -68   | 106   |
| H(22C) | 3188 | 5583 | 83    | 106   |
| H(22D) | 3634 | 4279 | -442  | 113   |
| H(22E) | 3676 | 3966 | 218   | 113   |
| H(22F) | 3960 | 4497 | 43    | 113   |
| H(28A) | 3108 | 5173 | -448  | 97    |
| H(28B) | 3363 | 5609 | -31   | 97    |
| H(28C) | 2948 | 5369 | 218   | 97    |
| H(29A) | 3625 | 3985 | -14   | 90    |
| H(29B) | 3822 | 4531 | -353  | 90    |
| H(29C) | 3388 | 4318 | -549  | 90    |
| H(230) | 4367 | 5779 | 1481  | 94    |
| H(30B) | 4255 | 5890 | 1588  | 94    |
| H(23A) | 4026 | 6248 | 2226  | 145   |
| H(23B) | 4489 | 6242 | 2377  | 145   |
| H(23C) | 4196 | 5818 | 2743  | 145   |
| H(23D) | 4642 | 4913 | 1572  | 150   |
| H(23E) | 4614 | 4960 | 2311  | 150   |
| H(23F) | 4881 | 5410 | 1931  | 150   |

|        |      |      |      |     |
|--------|------|------|------|-----|
| H(31A) | 4141 | 6084 | 2578 | 104 |
| H(31B) | 4578 | 6218 | 2333 | 104 |
| H(31C) | 4499 | 5663 | 2760 | 104 |
| H(32A) | 4552 | 5139 | 1160 | 161 |
| H(32B) | 4798 | 5086 | 1791 | 161 |
| H(32C) | 4808 | 5677 | 1402 | 161 |
| H(233) | 2830 | 4398 | 2386 | 58  |
| H(33B) | 2884 | 4243 | 2377 | 58  |
| H(23G) | 3099 | 3781 | 3158 | 99  |
| H(23H) | 3536 | 3996 | 2984 | 99  |
| H(23I) | 3283 | 3631 | 2493 | 99  |
| H(23J) | 2871 | 4776 | 3407 | 108 |
| H(23K) | 2913 | 5289 | 2912 | 108 |
| H(23L) | 3297 | 5044 | 3259 | 108 |
| H(34A) | 3130 | 3999 | 3367 | 96  |
| H(34B) | 3526 | 4362 | 3238 | 96  |
| H(34C) | 3436 | 3787 | 2848 | 96  |
| H(35A) | 2731 | 4882 | 3218 | 105 |
| H(35B) | 2740 | 5229 | 2576 | 105 |
| H(35C) | 3106 | 5274 | 3044 | 105 |
| H(238) | 1274 | 5900 | 1454 | 63  |
| H(240) | 1430 | 5539 | -341 | 61  |
| H(242) | 1854 | 4731 | 2018 | 62  |
| H(24A) | 1169 | 4788 | 2136 | 128 |
| H(24B) | 1213 | 5444 | 2368 | 128 |
| H(24C) | 1398 | 4927 | 2768 | 128 |
| H(24D) | 2020 | 5417 | 2762 | 128 |
| H(24E) | 1874 | 5928 | 2314 | 128 |
| H(24F) | 2249 | 5542 | 2127 | 128 |
| H(245) | 1029 | 6287 | -111 | 94  |
| H(45B) | 921  | 6453 | 741  | 94  |
| H(24G) | 479  | 6557 | 429  | 165 |
| H(24H) | 635  | 6204 | 1019 | 165 |
| H(24I) | 529  | 5868 | 391  | 165 |
| H(24J) | 1483 | 6916 | 344  | 153 |
| H(24K) | 1215 | 6941 | 956  | 153 |

|        |      |      |       |     |
|--------|------|------|-------|-----|
| H(24L) | 1048 | 7190 | 315   | 153 |
| H(46A) | 549  | 6412 | -157  | 187 |
| H(46B) | 568  | 5795 | 182   | 187 |
| H(46C) | 833  | 5914 | -420  | 187 |
| H(47A) | 1477 | 6926 | 310   | 158 |
| H(47B) | 1074 | 7122 | -17   | 158 |
| H(47C) | 1362 | 6673 | -357  | 158 |
| H(248) | 2055 | 4317 | -79   | 61  |
| H(48B) | 1989 | 4262 | -139  | 61  |
| H(49A) | 1449 | 4206 | -559  | 97  |
| H(49B) | 1794 | 4207 | -1068 | 97  |
| H(49C) | 1525 | 4771 | -973  | 97  |
| H(50A) | 2396 | 4723 | -914  | 124 |
| H(50B) | 2485 | 5065 | -284  | 124 |
| H(50C) | 2188 | 5335 | -784  | 124 |
| H(24M) | 1782 | 4442 | -1175 | 97  |
| H(24N) | 1618 | 5065 | -976  | 97  |
| H(24O) | 1410 | 4490 | -719  | 97  |
| H(25A) | 2462 | 4748 | -764  | 102 |
| H(25B) | 2492 | 4977 | -65   | 102 |
| H(25C) | 2273 | 5360 | -578  | 102 |
| H(316) | 975  | 2556 | 1119  | 54  |
| H(318) | 372  | 2491 | -488  | 59  |
| H(320) | 1456 | 1792 | -394  | 54  |
| H(323) | 38   | 4231 | 987   | 85  |
| H(325) | -576 | 2763 | 1263  | 90  |
| H(327) | 841  | 3551 | 198   | 86  |
| H(32D) | 385  | 4078 | -405  | 145 |
| H(32E) | 764  | 4470 | -257  | 145 |
| H(32F) | 361  | 4570 | 118   | 145 |
| H(32G) | 994  | 3834 | 1203  | 143 |
| H(32H) | 742  | 4416 | 1116  | 143 |
| H(32I) | 1135 | 4315 | 716   | 143 |
| H(330) | -897 | 3714 | 1333  | 122 |
| H(33A) | -660 | 4534 | 863   | 176 |
| H(33B) | -435 | 4715 | 1487  | 176 |

|        |      |      |       |     |
|--------|------|------|-------|-----|
| H(33C) | -908 | 4687 | 1475  | 176 |
| H(33D) | -673 | 3310 | 2191  | 186 |
| H(33E) | -904 | 3900 | 2337  | 186 |
| H(33F) | -431 | 3885 | 2362  | 186 |
| H(333) | 121  | 1818 | 573   | 92  |
| H(33G) | -165 | 1316 | 1421  | 171 |
| H(33H) | -360 | 1906 | 1666  | 171 |
| H(33I) | 111  | 1830 | 1670  | 171 |
| H(33J) | -515 | 1407 | 410   | 138 |
| H(33K) | -480 | 1995 | 18    | 138 |
| H(33L) | -722 | 1988 | 656   | 138 |
| H(338) | 490  | 977  | -2130 | 62  |
| H(340) | 948  | 2519 | -2579 | 68  |
| H(342) | 777  | 1024 | -547  | 62  |
| H(34D) | 143  | 638  | -408  | 96  |
| H(34E) | 13   | 886  | -1071 | 96  |
| H(34F) | 126  | 1324 | -522  | 96  |
| H(34G) | 665  | 49   | -822  | 95  |
| H(34H) | 1005 | 323  | -1248 | 95  |
| H(34I) | 568  | 239  | -1520 | 95  |
| H(345) | 406  | 1299 | -3153 | 71  |
| H(34J) | 846  | 1512 | -3950 | 106 |
| H(34K) | 1072 | 1228 | -3372 | 106 |
| H(34L) | 1098 | 1912 | -3490 | 106 |
| H(34M) | 249  | 2095 | -3803 | 98  |
| H(34N) | 466  | 2526 | -3331 | 98  |
| H(34O) | 73   | 2191 | -3122 | 98  |
| H(348) | 1246 | 2911 | -1045 | 78  |
| H(34P) | 1743 | 2610 | -1746 | 111 |
| H(34Q) | 1722 | 3303 | -1713 | 111 |
| H(34R) | 1532 | 2967 | -2290 | 111 |
| H(35D) | 1078 | 3781 | -1527 | 120 |
| H(35E) | 691  | 3402 | -1387 | 120 |
| H(35F) | 866  | 3431 | -2076 | 120 |
| H(16C) | 993  | 2445 | 1105  | 55  |
| H(18C) | 355  | 2384 | -469  | 60  |

|        |      |      |       |     |
|--------|------|------|-------|-----|
| H(20C) | 1476 | 1805 | -467  | 55  |
| H(23M) | 99   | 3913 | 1485  | 87  |
| H(25D) | -496 | 2406 | 1513  | 90  |
| H(27C) | 849  | 3410 | 461   | 86  |
| H(28D) | 1034 | 3541 | 1481  | 126 |
| H(28E) | 789  | 4135 | 1515  | 126 |
| H(28F) | 1168 | 4086 | 1072  | 126 |
| H(29D) | 390  | 3978 | -43   | 133 |
| H(29E) | 786  | 4331 | 116   | 133 |
| H(29F) | 395  | 4427 | 522   | 133 |
| H(30C) | -780 | 3443 | 1910  | 122 |
| H(31D) | -421 | 4290 | 1771  | 170 |
| H(31E) | -144 | 4126 | 2347  | 170 |
| H(31F) | -604 | 4259 | 2454  | 170 |
| H(32J) | -580 | 2696 | 2489  | 181 |
| H(32K) | -701 | 3241 | 2908  | 181 |
| H(32L) | -244 | 3090 | 2799  | 181 |
| H(33M) | 134  | 1657 | 488   | 92  |
| H(34S) | -266 | 1003 | 1058  | 145 |
| H(34T) | -453 | 1532 | 1439  | 145 |
| H(34U) | 5    | 1373 | 1521  | 145 |
| H(35G) | -494 | 1428 | 53    | 110 |
| H(35H) | -376 | 2078 | -127  | 110 |
| H(35I) | -691 | 1962 | 412   | 110 |
| H(38C) | 422  | 1029 | -2120 | 63  |
| H(40C) | 999  | 2474 | -2621 | 67  |
| H(42C) | 702  | 1116 | -524  | 63  |
| H(43A) | 549  | 153  | -746  | 89  |
| H(43B) | 907  | 375  | -1170 | 89  |
| H(43C) | 472  | 318  | -1456 | 89  |
| H(44A) | 46   | 809  | -376  | 97  |
| H(44B) | -66  | 1023 | -1060 | 97  |
| H(44C) | 60   | 1485 | -543  | 97  |
| H(45C) | 334  | 1358 | -3117 | 71  |
| H(46D) | 306  | 2092 | -3847 | 98  |
| H(46E) | 579  | 2489 | -3414 | 98  |



|        |      |      |       |     |
|--------|------|------|-------|-----|
| H(46F) | 148  | 2299 | -3184 | 98  |
| H(47D) | 773  | 1341 | -3960 | 97  |
| H(47E) | 952  | 1012 | -3370 | 97  |
| H(47F) | 1104 | 1650 | -3543 | 97  |
| H(48C) | 1257 | 2922 | -1083 | 77  |
| H(49D) | 847  | 3494 | -1711 | 111 |
| H(49E) | 1132 | 3382 | -2292 | 111 |
| H(49F) | 1290 | 3742 | -1707 | 111 |
| H(50D) | 1854 | 3076 | -1622 | 108 |
| H(50E) | 1708 | 2642 | -2153 | 108 |
| H(50F) | 1786 | 2405 | -1466 | 108 |
| H(1A)  | 2908 | 1298 | 184   | 63  |
| H(1B)  | 2446 | 1136 | 237   | 63  |
| H(2A)  | 2699 | 1093 | 1232  | 56  |
| H(2B)  | 2909 | 1713 | 1156  | 56  |
| H(3A)  | 2583 | 2904 | 2096  | 55  |
| H(3B)  | 2858 | 2595 | 1588  | 55  |
| H(4A)  | 2570 | 1856 | 2134  | 58  |
| H(4B)  | 2141 | 2152 | 2091  | 58  |
| H(5A)  | 1539 | 1904 | 1648  | 63  |
| H(5B)  | 1379 | 1384 | 1218  | 63  |
| H(6A)  | 1994 | 1176 | 1768  | 57  |
| H(6B)  | 2004 | 1046 | 1038  | 57  |

---

**Table 6. Crystal data and structure refinement for**  
**{[(HIPTNCH<sub>2</sub>CH<sub>2</sub>)<sub>2</sub>NCH<sub>2</sub>CH<sub>2</sub>N(3,5-Me<sub>2</sub>C<sub>6</sub>H<sub>3</sub>)]MoN<sub>2</sub>}Na(THF)<sub>2</sub>.**

|                                   |                                             |           |
|-----------------------------------|---------------------------------------------|-----------|
| Identification code               | 04169                                       |           |
| Empirical formula                 | C103.33 H156.33 Mo N6 Na O2.17              |           |
| Formula weight                    | 1636.27                                     |           |
| Temperature                       | 100(2) K                                    |           |
| Wavelength                        | 0.71073 Å                                   |           |
| Crystal system                    | Rhombohedral                                |           |
| Space group                       | R-3                                         |           |
| Unit cell dimensions              | a = 32.204(5) Å                             | a = 90°.  |
|                                   | b = 32.204(5) Å                             | b = 90°.  |
|                                   | c = 51.045(10) Å                            | g = 120°. |
| Volume                            | 45845(13) Å <sup>3</sup>                    |           |
| Z                                 | 18                                          |           |
| Density (calculated)              | 1.067 Mg/m <sup>3</sup>                     |           |
| Absorption coefficient            | 0.180 mm <sup>-1</sup>                      |           |
| F(000)                            | 15996                                       |           |
| Crystal size                      | 0.24 x 0.18 x 0.04 mm <sup>3</sup>          |           |
| Theta range for data collection   | 0.83 to 25.02°.                             |           |
| Index ranges                      | -38<=h<=19, 0<=k<=38, 0<=l<=60              |           |
| Reflections collected             | 229429                                      |           |
| Independent reflections           | 17866 [R(int) = 0.1206]                     |           |
| Completeness to theta = 25.02°    | 99.3 %                                      |           |
| Absorption correction             | Semi-empirical from equivalents             |           |
| Max. and min. transmission        | 0.9928 and 0.9580                           |           |
| Refinement method                 | Full-matrix least-squares on F <sup>2</sup> |           |
| Data / restraints / parameters    | 17866 / 1707 / 1197                         |           |
| Goodness-of-fit on F <sup>2</sup> | 1.043                                       |           |
| Final R indices [I>2sigma(I)]     | R1 = 0.0742, wR2 = 0.1953                   |           |
| R indices (all data)              | R1 = 0.1066, wR2 = 0.2130                   |           |
| Largest diff. peak and hole       | 1.135 and -0.466 e.Å <sup>-3</sup>          |           |

**Table 7. Atomic coordinates (  $\times 10^4$ ) and equivalent isotropic displacement parameters ( $\text{\AA}^2 \times 10^3$ ) for 04169.  $U(\text{eq})$  is defined as one third of the trace of the orthogonalized  $U^{ij}$  tensor.**

|        | x       | y       | z       | $U(\text{eq})$ |
|--------|---------|---------|---------|----------------|
| Mo(1)  | 1417(1) | 7989(1) | 1611(1) | 27(1)          |
| N(1)   | 794(2)  | 7841(1) | 1800(1) | 31(1)          |
| N(2)   | 2067(2) | 8493(2) | 1739(1) | 35(1)          |
| N(3)   | 1417(2) | 7432(1) | 1429(1) | 29(1)          |
| N(4)   | 1484(2) | 7618(2) | 1959(1) | 36(1)          |
| N(5)   | 1400(1) | 8365(1) | 1334(1) | 30(1)          |
| N(6)   | 1411(2) | 8632(2) | 1175(1) | 41(1)          |
| C(1)   | 756(2)  | 7658(2) | 2071(1) | 39(1)          |
| C(2)   | 1004(2) | 7363(2) | 2083(1) | 41(1)          |
| C(3)   | 2252(2) | 8372(2) | 1976(1) | 43(1)          |
| C(4)   | 1849(2) | 7996(2) | 2133(1) | 45(1)          |
| C(5)   | 1375(2) | 7051(2) | 1608(1) | 37(1)          |
| C(6)   | 1632(2) | 7279(2) | 1862(1) | 39(1)          |
| C(115) | 1410(2) | 7329(2) | 1159(1) | 29(1)          |
| C(116) | 1616(2) | 7706(2) | 978(1)  | 29(1)          |
| C(117) | 1648(2) | 7632(2) | 713(1)  | 33(1)          |
| C(118) | 1466(2) | 7165(2) | 621(1)  | 40(1)          |
| C(119) | 1252(2) | 6777(2) | 795(1)  | 39(1)          |
| C(120) | 1230(2) | 6862(2) | 1060(1) | 35(1)          |
| C(121) | 1922(2) | 8061(2) | 537(1)  | 36(1)          |
| C(122) | 2396(2) | 8197(2) | 467(1)  | 42(1)          |
| C(123) | 2657(2) | 8604(2) | 315(1)  | 46(1)          |
| C(124) | 2471(2) | 8875(2) | 228(1)  | 55(2)          |
| C(125) | 2002(2) | 8740(3) | 301(1)  | 67(2)          |
| C(126) | 1723(2) | 8335(2) | 454(1)  | 52(2)          |
| C(127) | 2655(3) | 7937(2) | 577(2)  | 70(2)          |
| C(128) | 3020(4) | 8238(4) | 789(2)  | 103(3)         |
| C(129) | 2883(4) | 7792(3) | 358(2)  | 121(4)         |
| C(130) | 2763(3) | 9330(3) | 64(1)   | 71(2)          |
| C(131) | 2545(3) | 9255(4) | -205(2) | 119(4)         |
| C(132) | 2866(3) | 9772(3) | 194(2)  | 94(3)          |

|        |          |          |         |         |
|--------|----------|----------|---------|---------|
| C(133) | 1205(2)  | 8192(3)  | 522(2)  | 69(2)   |
| C(134) | 865(3)   | 7843(3)  | 320(2)  | 96(3)   |
| C(135) | 1123(2)  | 8613(3)  | 556(1)  | 71(2)   |
| C(136) | 1083(2)  | 6278(2)  | 691(1)  | 48(1)   |
| C(137) | 616(3)   | 6000(2)  | 604(1)  | 55(2)   |
| C(138) | 473(3)   | 5547(2)  | 493(1)  | 72(2)   |
| C(139) | 790(4)   | 5370(2)  | 471(2)  | 80(2)   |
| C(140) | 1254(3)  | 5657(2)  | 564(2)  | 87(3)   |
| C(141) | 1409(3)  | 6106(2)  | 674(2)  | 70(2)   |
| C(142) | 266(3)   | 6176(2)  | 615(2)  | 71(2)   |
| C(143) | -230(3)  | 5809(3)  | 722(2)  | 83(2)   |
| C(144) | 240(4)   | 6370(3)  | 339(2)  | 113(4)  |
| C(145) | 648(4)   | 4892(3)  | 344(2)  | 117(4)  |
| C(146) | 225(4)   | 4497(3)  | 432(2)  | 126(5)  |
| C(147) | 780(3)   | 4933(3)  | 67(1)   | 78(2)   |
| C(148) | 1920(3)  | 6385(3)  | 783(2)  | 99(3)   |
| C(149) | 1982(4)  | 6150(4)  | 1033(3) | 139(4)  |
| C(150) | 2294(4)  | 6461(4)  | 575(3)  | 178(6)  |
| C(215) | 432(2)   | 7947(2)  | 1737(1) | 32(1)   |
| C(216) | 139(2)   | 7998(2)  | 1926(1) | 37(1)   |
| C(217) | -228(2)  | 8090(2)  | 1851(1) | 40(1)   |
| C(218) | -299(2)  | 8141(2)  | 1590(1) | 39(1)   |
| C(219) | -12(2)   | 8102(2)  | 1399(1) | 33(1)   |
| C(220) | 350(2)   | 8011(2)  | 1473(1) | 31(1)   |
| C(221) | -528(2)  | 8125(2)  | 2068(1) | 45(1)   |
| C(222) | -370(2)  | 8552(3)  | 2210(1) | 58(2)   |
| C(223) | -636(3)  | 8560(3)  | 2421(2) | 72(2)   |
| C(224) | -1056(3) | 8165(3)  | 2497(1) | 74(2)   |
| C(225) | -1223(2) | 7760(3)  | 2351(1) | 62(2)   |
| C(226) | -967(2)  | 7730(2)  | 2135(1) | 49(1)   |
| C(227) | 87(3)    | 9009(3)  | 2128(2) | 70(2)   |
| C(228) | -17(3)   | 9277(3)  | 1915(2) | 90(2)   |
| C(229) | 368(3)   | 9349(3)  | 2347(2) | 105(3)  |
| C(230) | -1325(4) | 8180(4)  | 2744(2) | 111(3)  |
| C(231) | -976(8)  | 8427(14) | 2953(5) | 175(16) |
| C(232) | -1777(6) | 7819(9)  | 2783(4) | 179(16) |

|        |          |          |         |         |
|--------|----------|----------|---------|---------|
| C(31B) | -1216(9) | 7962(11) | 2977(4) | 127(8)  |
| C(32B) | -1437(8) | 8531(8)  | 2780(3) | 113(8)  |
| C(233) | -1172(2) | 7260(2)  | 1985(1) | 51(2)   |
| C(234) | -1174(3) | 6861(3)  | 2154(1) | 65(2)   |
| C(235) | -1676(2) | 7111(3)  | 1880(1) | 58(2)   |
| C(236) | -71(2)   | 8176(2)  | 1114(1) | 35(1)   |
| C(237) | -231(2)  | 7797(2)  | 931(1)  | 38(1)   |
| C(238) | -284(2)  | 7881(2)  | 668(1)  | 43(1)   |
| C(239) | -190(2)  | 8327(2)  | 575(1)  | 49(1)   |
| C(240) | -28(2)   | 8695(2)  | 759(1)  | 50(1)   |
| C(241) | 38(2)    | 8636(2)  | 1021(1) | 41(1)   |
| C(242) | -332(2)  | 7301(2)  | 1012(1) | 40(1)   |
| C(243) | 58(2)    | 7202(2)  | 914(1)  | 48(1)   |
| C(244) | -826(2)  | 6908(2)  | 918(1)  | 56(2)   |
| C(245) | -249(3)  | 8420(3)  | 285(1)  | 63(2)   |
| C(246) | 208(4)   | 8736(6)  | 158(3)  | 77(5)   |
| C(247) | -567(6)  | 7972(5)  | 138(3)  | 81(5)   |
| C(46B) | -26(6)   | 8244(7)  | 102(3)  | 74(5)   |
| C(47B) | -750(6)  | 8282(12) | 226(4)  | 134(11) |
| C(248) | 250(2)   | 9068(2)  | 1199(1) | 49(2)   |
| C(249) | 766(2)   | 9436(2)  | 1113(2) | 64(2)   |
| C(250) | -64(2)   | 9305(2)  | 1210(2) | 63(2)   |
| C(315) | 2401(2)  | 8926(2)  | 1613(1) | 35(1)   |
| C(316) | 2650(2)  | 9368(2)  | 1748(1) | 40(1)   |
| C(317) | 2950(2)  | 9794(2)  | 1617(1) | 43(1)   |
| C(318) | 2998(2)  | 9783(2)  | 1346(1) | 50(1)   |
| C(319) | 2768(2)  | 9349(2)  | 1205(1) | 46(1)   |
| C(320) | 2481(2)  | 8929(2)  | 1346(1) | 39(1)   |
| C(321) | 3235(2)  | 10262(2) | 1763(1) | 57(2)   |
| C(322) | 2836(2)  | 9338(2)  | 916(1)  | 63(2)   |
| Na(1)  | 1961(1)  | 9429(1)  | 1293(1) | 77(1)   |
| O(1T)  | 1627(2)  | 9606(2)  | 1629(1) | 68(1)   |
| C(1T)  | 1846(3)  | 9950(3)  | 1834(2) | 105(3)  |
| C(2T)  | 1729(4)  | 9673(4)  | 2080(2) | 112(3)  |
| C(3T)  | 1403(3)  | 9162(3)  | 2002(2) | 83(2)   |
| C(4T)  | 1228(2)  | 9199(2)  | 1746(1) | 64(2)   |

|       |           |           |          |         |
|-------|-----------|-----------|----------|---------|
| O(2T) | 2232(5)   | 10141(4)  | 1103(2)  | 62(3)   |
| C(5T) | 2347(7)   | 10141(6)  | 835(3)   | 78(4)   |
| C(6T) | 2089(10)  | 10339(10) | 692(3)   | 109(6)  |
| C(7T) | 2005(11)  | 10631(9)  | 887(4)   | 90(6)   |
| C(8T) | 2076(14)  | 10481(10) | 1146(4)  | 61(4)   |
| O(2U) | 2045(5)   | 10008(4)  | 983(3)   | 69(3)   |
| C(5U) | 2088(16)  | 10441(10) | 1093(4)  | 79(6)   |
| C(6U) | 2168(10)  | 10771(6)  | 871(5)   | 97(7)   |
| C(7U) | 1865(8)   | 10432(6)  | 663(4)   | 100(6)  |
| C(8U) | 1936(8)   | 10019(6)  | 706(3)   | 97(6)   |
| C(1X) | 997(7)    | 5637(7)   | -616(3)  | 97(5)   |
| C(2X) | 1161(14)  | 6047(8)   | -425(6)  | 201(12) |
| C(3X) | 1104(10)  | 6444(7)   | -541(5)  | 162(10) |
| C(4X) | 1222(10)  | 6843(6)   | -340(5)  | 179(11) |
| C(5X) | 1149(9)   | 7222(6)   | -476(4)  | 187(12) |
| C(6X) | 1357(10)  | 7628(7)   | -276(5)  | 214(13) |
| C(7X) | 1357(7)   | 8042(6)   | -393(4)  | 99(6)   |
| C(1Y) | -511(12)  | 9696(12)  | 3130(7)  | 245(15) |
| C(2Y) | -885(12)  | 9849(11)  | 3156(9)  | 256(16) |
| C(3Y) | -1386(11) | 9467(10)  | 3218(9)  | 291(17) |
| C(4Y) | -1700(11) | 9697(11)  | 3241(8)  | 320(18) |
| C(5Y) | -1766(15) | 9818(17)  | 2968(9)  | 370(20) |
| C(6Y) | -2219(13) | 9821(11)  | 2929(13) | 380(20) |
| C(7Y) | -2136(4)  | 10309(5)  | 2843(2)  | 410(30) |
| C(1W) | 2717(4)   | 7869(5)   | 1393(2)  | 158(12) |
| C(2W) | 2579(4)   | 7375(5)   | 1326(2)  | 113(8)  |
| C(3W) | 2960(4)   | 7383(5)   | 1403(2)  | 149(11) |
| C(4W) | 2814(4)   | 6910(5)   | 1476(2)  | 158(12) |
| C(5W) | 2365(4)   | 6554(5)   | 1727(2)  | 152(16) |
| O(1G) | 22(4)     | 9892(5)   | 488(2)   | 107(9)  |
| C(1G) | -27(4)    | 10281(5)  | 397(2)   | 112(10) |
| C(2G) | 424(4)    | 10638(5)  | 299(2)   | 138(11) |
| C(3G) | 753(4)    | 10470(5)  | 330(2)   | 138(11) |
| C(4G) | 505(4)    | 10008(5)  | 447(2)   | 112(10) |

---

**Table 8. Bond lengths [Å] and angles [°] for 04169.**

---

|               |          |
|---------------|----------|
| Mo(1)-N(5)    | 1.882(4) |
| Mo(1)-N(2)    | 2.012(4) |
| Mo(1)-N(3)    | 2.022(4) |
| Mo(1)-N(1)    | 2.053(4) |
| Mo(1)-N(4)    | 2.209(4) |
| N(1)-C(215)   | 1.404(6) |
| N(1)-C(1)     | 1.488(6) |
| N(2)-C(315)   | 1.418(7) |
| N(2)-C(3)     | 1.481(7) |
| N(3)-C(115)   | 1.413(6) |
| N(3)-C(5)     | 1.482(6) |
| N(4)-C(6)     | 1.477(7) |
| N(4)-C(2)     | 1.483(7) |
| N(4)-C(4)     | 1.490(7) |
| N(5)-N(6)     | 1.171(6) |
| N(5)-Na(1)    | 2.976(5) |
| N(6)-Na(1)    | 2.353(6) |
| C(1)-C(2)     | 1.519(8) |
| C(3)-C(4)     | 1.491(8) |
| C(5)-C(6)     | 1.517(7) |
| C(115)-C(116) | 1.400(7) |
| C(115)-C(120) | 1.405(7) |
| C(116)-C(117) | 1.386(7) |
| C(117)-C(118) | 1.395(7) |
| C(117)-C(121) | 1.508(7) |
| C(118)-C(119) | 1.400(7) |
| C(119)-C(120) | 1.392(7) |
| C(119)-C(136) | 1.512(7) |
| C(121)-C(126) | 1.391(8) |
| C(121)-C(122) | 1.405(8) |
| C(122)-C(123) | 1.388(8) |
| C(122)-C(127) | 1.554(9) |
| C(123)-C(124) | 1.356(9) |
| C(124)-C(125) | 1.399(9) |

|               |           |
|---------------|-----------|
| C(124)-C(130) | 1.534(8)  |
| C(125)-C(126) | 1.393(8)  |
| C(126)-C(133) | 1.534(9)  |
| C(127)-C(129) | 1.533(11) |
| C(127)-C(128) | 1.534(12) |
| C(130)-C(132) | 1.451(11) |
| C(130)-C(131) | 1.508(10) |
| C(133)-C(134) | 1.515(11) |
| C(133)-C(135) | 1.516(11) |
| C(136)-C(137) | 1.385(9)  |
| C(136)-C(141) | 1.413(10) |
| C(137)-C(138) | 1.411(8)  |
| C(137)-C(142) | 1.494(10) |
| C(138)-C(139) | 1.402(12) |
| C(139)-C(140) | 1.388(13) |
| C(139)-C(145) | 1.516(9)  |
| C(140)-C(141) | 1.391(9)  |
| C(141)-C(148) | 1.534(12) |
| C(142)-C(143) | 1.535(11) |
| C(142)-C(144) | 1.556(11) |
| C(145)-C(146) | 1.396(11) |
| C(145)-C(147) | 1.464(10) |
| C(148)-C(150) | 1.532(13) |
| C(148)-C(149) | 1.545(15) |
| C(215)-C(220) | 1.408(7)  |
| C(215)-C(216) | 1.415(7)  |
| C(216)-C(217) | 1.408(8)  |
| C(217)-C(218) | 1.374(8)  |
| C(217)-C(221) | 1.513(8)  |
| C(218)-C(219) | 1.394(7)  |
| C(219)-C(220) | 1.385(7)  |
| C(219)-C(236) | 1.504(7)  |
| C(221)-C(226) | 1.391(9)  |
| C(221)-C(222) | 1.405(8)  |
| C(222)-C(223) | 1.384(9)  |
| C(222)-C(227) | 1.532(10) |



|               |           |
|---------------|-----------|
| C(223)-C(224) | 1.370(11) |
| C(224)-C(225) | 1.362(10) |
| C(224)-C(230) | 1.543(10) |
| C(225)-C(226) | 1.408(8)  |
| C(226)-C(233) | 1.519(9)  |
| C(227)-C(229) | 1.511(10) |
| C(227)-C(228) | 1.526(12) |
| C(230)-C(232) | 1.348(16) |
| C(230)-C(32B) | 1.360(15) |
| C(230)-C(231) | 1.463(17) |
| C(230)-C(31B) | 1.508(16) |
| C(233)-C(235) | 1.539(9)  |
| C(233)-C(234) | 1.544(9)  |
| C(236)-C(237) | 1.414(7)  |
| C(236)-C(241) | 1.421(7)  |
| C(237)-C(238) | 1.397(8)  |
| C(237)-C(242) | 1.517(8)  |
| C(238)-C(239) | 1.394(8)  |
| C(239)-C(240) | 1.392(9)  |
| C(239)-C(245) | 1.541(8)  |
| C(240)-C(241) | 1.385(8)  |
| C(241)-C(248) | 1.508(8)  |
| C(242)-C(243) | 1.527(8)  |
| C(242)-C(244) | 1.530(8)  |
| C(245)-C(46B) | 1.458(14) |
| C(245)-C(246) | 1.459(13) |
| C(245)-C(47B) | 1.473(15) |
| C(245)-C(247) | 1.489(13) |
| C(248)-C(250) | 1.542(8)  |
| C(248)-C(249) | 1.546(9)  |
| C(315)-C(320) | 1.387(7)  |
| C(315)-C(316) | 1.414(7)  |
| C(315)-Na(1)  | 3.100(6)  |
| C(316)-C(317) | 1.392(8)  |
| C(317)-C(318) | 1.393(8)  |
| C(317)-C(321) | 1.513(8)  |

|               |           |
|---------------|-----------|
| C(318)-C(319) | 1.408(8)  |
| C(318)-Na(1)  | 2.950(6)  |
| C(319)-C(320) | 1.399(8)  |
| C(319)-C(322) | 1.496(8)  |
| C(319)-Na(1)  | 2.769(6)  |
| C(320)-Na(1)  | 2.855(6)  |
| Na(1)-O(2T)   | 2.226(10) |
| Na(1)-O(1T)   | 2.246(6)  |
| Na(1)-O(2U)   | 2.356(10) |
| Na(1)-C(5T)   | 3.065(15) |
| Na(1)-C(4T)   | 3.120(7)  |
| O(1T)-C(1T)   | 1.427(8)  |
| O(1T)-C(4T)   | 1.430(7)  |
| C(1T)-C(2T)   | 1.477(11) |
| C(2T)-C(3T)   | 1.500(11) |
| C(3T)-C(4T)   | 1.451(9)  |
| O(2T)-C(5T)   | 1.416(14) |
| O(2T)-C(8T)   | 1.430(14) |
| C(5T)-C(6T)   | 1.472(15) |
| C(6T)-C(7T)   | 1.486(17) |
| C(7T)-C(8T)   | 1.466(15) |
| O(2U)-C(5U)   | 1.445(14) |
| O(2U)-C(8U)   | 1.458(14) |
| C(5U)-C(6U)   | 1.485(16) |
| C(6U)-C(7U)   | 1.484(17) |
| C(7U)-C(8U)   | 1.475(15) |
| C(1X)-C(2X)   | 1.511(17) |
| C(2X)-C(3X)   | 1.499(17) |
| C(3X)-C(4X)   | 1.537(17) |
| C(4X)-C(5X)   | 1.523(17) |
| C(5X)-C(6X)   | 1.525(18) |
| C(6X)-C(7X)   | 1.462(16) |
| C(1Y)-C(2Y)   | 1.517(17) |
| C(2Y)-C(3Y)   | 1.495(17) |
| C(3Y)-C(4Y)   | 1.526(17) |
| C(4Y)-C(5Y)   | 1.492(19) |

|                   |            |
|-------------------|------------|
| C(5Y)-C(6Y)       | 1.477(18)  |
| C(6Y)-C(7Y)       | 1.520(17)  |
| C(1W)-C(2W)       | 1.4623     |
| C(2W)-C(3W)       | 1.2767     |
| C(3W)-C(4W)       | 1.4014     |
| C(4W)-C(5W)       | 1.8409     |
| O(1G)-C(1G)       | 1.4200     |
| O(1G)-C(4G)       | 1.4200     |
| C(1G)-C(2G)       | 1.4200     |
| C(2G)-C(3G)       | 1.4199     |
| C(3G)-C(4G)       | 1.4200     |
| N(5)-Mo(1)-N(2)   | 94.50(17)  |
| N(5)-Mo(1)-N(3)   | 103.59(16) |
| N(2)-Mo(1)-N(3)   | 113.78(17) |
| N(5)-Mo(1)-N(1)   | 99.39(17)  |
| N(2)-Mo(1)-N(1)   | 122.50(17) |
| N(3)-Mo(1)-N(1)   | 116.36(16) |
| N(5)-Mo(1)-N(4)   | 174.09(17) |
| N(2)-Mo(1)-N(4)   | 80.32(17)  |
| N(3)-Mo(1)-N(4)   | 81.25(16)  |
| N(1)-Mo(1)-N(4)   | 81.21(16)  |
| C(215)-N(1)-C(1)  | 113.1(4)   |
| C(215)-N(1)-Mo(1) | 132.1(3)   |
| C(1)-N(1)-Mo(1)   | 114.0(3)   |
| C(315)-N(2)-C(3)  | 114.9(4)   |
| C(315)-N(2)-Mo(1) | 128.1(3)   |
| C(3)-N(2)-Mo(1)   | 116.5(3)   |
| C(115)-N(3)-C(5)  | 114.9(4)   |
| C(115)-N(3)-Mo(1) | 130.7(3)   |
| C(5)-N(3)-Mo(1)   | 114.2(3)   |
| C(6)-N(4)-C(2)    | 111.4(4)   |
| C(6)-N(4)-C(4)    | 113.0(4)   |
| C(2)-N(4)-C(4)    | 112.1(4)   |
| C(6)-N(4)-Mo(1)   | 106.6(3)   |
| C(2)-N(4)-Mo(1)   | 106.6(3)   |
| C(4)-N(4)-Mo(1)   | 106.6(3)   |

|                      |            |
|----------------------|------------|
| N(6)-N(5)-Mo(1)      | 174.2(4)   |
| N(6)-N(5)-Na(1)      | 47.7(3)    |
| Mo(1)-N(5)-Na(1)     | 126.69(19) |
| N(5)-N(6)-Na(1)      | 110.7(4)   |
| N(1)-C(1)-C(2)       | 108.6(4)   |
| N(4)-C(2)-C(1)       | 111.4(4)   |
| N(2)-C(3)-C(4)       | 110.5(4)   |
| N(4)-C(4)-C(3)       | 110.8(4)   |
| N(3)-C(5)-C(6)       | 108.9(4)   |
| N(4)-C(6)-C(5)       | 110.3(4)   |
| C(116)-C(115)-C(120) | 117.0(4)   |
| C(116)-C(115)-N(3)   | 119.5(4)   |
| C(120)-C(115)-N(3)   | 123.4(4)   |
| C(117)-C(116)-C(115) | 122.6(4)   |
| C(116)-C(117)-C(118) | 119.0(5)   |
| C(116)-C(117)-C(121) | 119.0(4)   |
| C(118)-C(117)-C(121) | 121.7(5)   |
| C(117)-C(118)-C(119) | 120.2(5)   |
| C(120)-C(119)-C(118) | 119.4(5)   |
| C(120)-C(119)-C(136) | 121.5(5)   |
| C(118)-C(119)-C(136) | 118.9(5)   |
| C(119)-C(120)-C(115) | 121.7(5)   |
| C(126)-C(121)-C(122) | 119.7(5)   |
| C(126)-C(121)-C(117) | 121.2(5)   |
| C(122)-C(121)-C(117) | 119.0(5)   |
| C(123)-C(122)-C(121) | 119.2(6)   |
| C(123)-C(122)-C(127) | 118.3(5)   |
| C(121)-C(122)-C(127) | 122.2(5)   |
| C(124)-C(123)-C(122) | 122.4(6)   |
| C(123)-C(124)-C(125) | 117.9(5)   |
| C(123)-C(124)-C(130) | 122.4(6)   |
| C(125)-C(124)-C(130) | 119.6(6)   |
| C(126)-C(125)-C(124) | 122.0(6)   |
| C(121)-C(126)-C(125) | 118.6(6)   |
| C(121)-C(126)-C(133) | 121.2(5)   |
| C(125)-C(126)-C(133) | 120.1(6)   |

|                      |           |
|----------------------|-----------|
| C(129)-C(127)-C(128) | 112.0(8)  |
| C(129)-C(127)-C(122) | 111.7(7)  |
| C(128)-C(127)-C(122) | 111.3(6)  |
| C(132)-C(130)-C(131) | 115.7(8)  |
| C(132)-C(130)-C(124) | 114.6(6)  |
| C(131)-C(130)-C(124) | 109.3(6)  |
| C(134)-C(133)-C(135) | 111.0(6)  |
| C(134)-C(133)-C(126) | 110.0(7)  |
| C(135)-C(133)-C(126) | 114.1(6)  |
| C(137)-C(136)-C(141) | 120.4(6)  |
| C(137)-C(136)-C(119) | 119.8(6)  |
| C(141)-C(136)-C(119) | 119.8(6)  |
| C(136)-C(137)-C(138) | 119.0(7)  |
| C(136)-C(137)-C(142) | 121.7(5)  |
| C(138)-C(137)-C(142) | 119.3(7)  |
| C(139)-C(138)-C(137) | 121.7(8)  |
| C(140)-C(139)-C(138) | 117.6(6)  |
| C(140)-C(139)-C(145) | 120.0(9)  |
| C(138)-C(139)-C(145) | 122.4(9)  |
| C(139)-C(140)-C(141) | 122.5(8)  |
| C(140)-C(141)-C(136) | 118.8(8)  |
| C(140)-C(141)-C(148) | 118.6(7)  |
| C(136)-C(141)-C(148) | 122.5(6)  |
| C(137)-C(142)-C(143) | 114.3(6)  |
| C(137)-C(142)-C(144) | 108.7(8)  |
| C(143)-C(142)-C(144) | 112.8(7)  |
| C(146)-C(145)-C(147) | 120.2(8)  |
| C(146)-C(145)-C(139) | 116.5(7)  |
| C(147)-C(145)-C(139) | 113.3(7)  |
| C(150)-C(148)-C(141) | 111.6(10) |
| C(150)-C(148)-C(149) | 111.5(10) |
| C(141)-C(148)-C(149) | 112.1(7)  |
| N(1)-C(215)-C(220)   | 119.6(4)  |
| N(1)-C(215)-C(216)   | 123.9(5)  |
| C(220)-C(215)-C(216) | 116.5(5)  |
| C(217)-C(216)-C(215) | 121.3(5)  |

|                      |           |
|----------------------|-----------|
| C(218)-C(217)-C(216) | 119.8(5)  |
| C(218)-C(217)-C(221) | 123.3(5)  |
| C(216)-C(217)-C(221) | 116.8(5)  |
| C(217)-C(218)-C(219) | 120.5(5)  |
| C(220)-C(219)-C(218) | 119.6(5)  |
| C(220)-C(219)-C(236) | 119.1(4)  |
| C(218)-C(219)-C(236) | 121.2(5)  |
| C(219)-C(220)-C(215) | 122.3(5)  |
| C(226)-C(221)-C(222) | 118.2(5)  |
| C(226)-C(221)-C(217) | 120.4(5)  |
| C(222)-C(221)-C(217) | 121.4(6)  |
| C(223)-C(222)-C(221) | 119.8(7)  |
| C(223)-C(222)-C(227) | 120.2(6)  |
| C(221)-C(222)-C(227) | 120.0(6)  |
| C(224)-C(223)-C(222) | 122.4(7)  |
| C(225)-C(224)-C(223) | 117.9(6)  |
| C(225)-C(224)-C(230) | 121.3(8)  |
| C(223)-C(224)-C(230) | 120.8(7)  |
| C(224)-C(225)-C(226) | 122.1(7)  |
| C(221)-C(226)-C(225) | 119.5(6)  |
| C(221)-C(226)-C(233) | 121.7(5)  |
| C(225)-C(226)-C(233) | 118.8(6)  |
| C(229)-C(227)-C(228) | 109.7(7)  |
| C(229)-C(227)-C(222) | 115.6(7)  |
| C(228)-C(227)-C(222) | 111.2(6)  |
| C(232)-C(230)-C(32B) | 94.5(16)  |
| C(232)-C(230)-C(231) | 124.7(16) |
| C(32B)-C(230)-C(231) | 84.4(19)  |
| C(232)-C(230)-C(31B) | 83.5(17)  |
| C(32B)-C(230)-C(31B) | 120.2(13) |
| C(231)-C(230)-C(31B) | 52.0(16)  |
| C(232)-C(230)-C(224) | 118.2(9)  |
| C(32B)-C(230)-C(224) | 121.3(11) |
| C(231)-C(230)-C(224) | 108.7(12) |
| C(31B)-C(230)-C(224) | 111.3(10) |
| C(226)-C(233)-C(235) | 110.6(5)  |

|                      |           |
|----------------------|-----------|
| C(226)-C(233)-C(234) | 111.5(5)  |
| C(235)-C(233)-C(234) | 111.7(6)  |
| C(237)-C(236)-C(241) | 118.4(5)  |
| C(237)-C(236)-C(219) | 121.4(5)  |
| C(241)-C(236)-C(219) | 120.2(5)  |
| C(238)-C(237)-C(236) | 119.5(5)  |
| C(238)-C(237)-C(242) | 118.7(5)  |
| C(236)-C(237)-C(242) | 121.7(5)  |
| C(239)-C(238)-C(237) | 122.8(6)  |
| C(240)-C(239)-C(238) | 116.4(5)  |
| C(240)-C(239)-C(245) | 120.6(6)  |
| C(238)-C(239)-C(245) | 123.0(6)  |
| C(241)-C(240)-C(239) | 123.5(6)  |
| C(240)-C(241)-C(236) | 119.3(5)  |
| C(240)-C(241)-C(248) | 119.0(5)  |
| C(236)-C(241)-C(248) | 121.6(5)  |
| C(237)-C(242)-C(243) | 111.4(5)  |
| C(237)-C(242)-C(244) | 112.0(5)  |
| C(243)-C(242)-C(244) | 110.5(5)  |
| C(46B)-C(245)-C(246) | 57.4(9)   |
| C(46B)-C(245)-C(47B) | 115.5(13) |
| C(246)-C(245)-C(47B) | 133.6(11) |
| C(46B)-C(245)-C(247) | 62.1(10)  |
| C(246)-C(245)-C(247) | 114.5(10) |
| C(47B)-C(245)-C(247) | 59.1(13)  |
| C(46B)-C(245)-C(239) | 113.9(8)  |
| C(246)-C(245)-C(239) | 112.6(7)  |
| C(47B)-C(245)-C(239) | 111.2(9)  |
| C(247)-C(245)-C(239) | 112.8(8)  |
| C(241)-C(248)-C(250) | 111.9(5)  |
| C(241)-C(248)-C(249) | 110.8(5)  |
| C(250)-C(248)-C(249) | 110.6(5)  |
| C(320)-C(315)-C(316) | 117.4(5)  |
| C(320)-C(315)-N(2)   | 120.0(4)  |
| C(316)-C(315)-N(2)   | 122.6(5)  |
| C(320)-C(315)-Na(1)  | 66.8(3)   |

|                      |            |
|----------------------|------------|
| C(316)-C(315)-Na(1)  | 84.6(3)    |
| N(2)-C(315)-Na(1)    | 115.6(3)   |
| C(317)-C(316)-C(315) | 121.6(5)   |
| C(316)-C(317)-C(318) | 118.9(5)   |
| C(316)-C(317)-C(321) | 121.3(5)   |
| C(318)-C(317)-C(321) | 119.8(5)   |
| C(317)-C(318)-C(319) | 121.5(6)   |
| C(317)-C(318)-Na(1)  | 89.1(4)    |
| C(319)-C(318)-Na(1)  | 68.7(3)    |
| C(320)-C(319)-C(318) | 117.5(5)   |
| C(320)-C(319)-C(322) | 121.3(5)   |
| C(318)-C(319)-C(322) | 121.2(6)   |
| C(320)-C(319)-Na(1)  | 79.0(3)    |
| C(318)-C(319)-Na(1)  | 83.0(4)    |
| C(322)-C(319)-Na(1)  | 108.6(4)   |
| C(315)-C(320)-C(319) | 123.0(5)   |
| C(315)-C(320)-Na(1)  | 86.7(3)    |
| C(319)-C(320)-Na(1)  | 72.2(3)    |
| O(2T)-Na(1)-O(1T)    | 93.5(3)    |
| O(2T)-Na(1)-N(6)     | 134.9(4)   |
| O(1T)-Na(1)-N(6)     | 106.07(18) |
| O(2T)-Na(1)-O(2U)    | 20.3(3)    |
| O(1T)-Na(1)-O(2U)    | 101.0(3)   |
| N(6)-Na(1)-O(2U)     | 114.7(4)   |
| O(2T)-Na(1)-C(319)   | 97.1(3)    |
| O(1T)-Na(1)-C(319)   | 137.5(2)   |
| N(6)-Na(1)-C(319)    | 95.04(18)  |
| O(2U)-Na(1)-C(319)   | 102.9(3)   |
| O(2T)-Na(1)-C(320)   | 125.8(3)   |
| O(1T)-Na(1)-C(320)   | 124.0(2)   |
| N(6)-Na(1)-C(320)    | 75.16(16)  |
| O(2U)-Na(1)-C(320)   | 130.1(3)   |
| C(319)-Na(1)-C(320)  | 28.75(17)  |
| O(2T)-Na(1)-C(318)   | 81.8(4)    |
| O(1T)-Na(1)-C(318)   | 115.1(2)   |
| N(6)-Na(1)-C(318)    | 122.34(19) |



|                     |            |
|---------------------|------------|
| O(2U)-Na(1)-C(318)  | 95.5(3)    |
| C(319)-Na(1)-C(318) | 28.27(16)  |
| C(320)-Na(1)-C(318) | 48.80(17)  |
| O(2T)-Na(1)-N(5)    | 156.4(4)   |
| O(1T)-Na(1)-N(5)    | 98.40(16)  |
| N(6)-Na(1)-N(5)     | 21.60(13)  |
| O(2U)-Na(1)-N(5)    | 136.3(4)   |
| C(319)-Na(1)-N(5)   | 87.86(16)  |
| C(320)-Na(1)-N(5)   | 62.21(14)  |
| C(318)-Na(1)-N(5)   | 110.91(17) |
| O(2T)-Na(1)-C(5T)   | 25.2(4)    |
| O(1T)-Na(1)-C(5T)   | 117.3(3)   |
| N(6)-Na(1)-C(5T)    | 115.1(4)   |
| O(2U)-Na(1)-C(5T)   | 18.9(4)    |
| C(319)-Na(1)-C(5T)  | 84.1(3)    |
| C(320)-Na(1)-C(5T)  | 111.2(3)   |
| C(318)-Na(1)-C(5T)  | 79.9(4)    |
| N(5)-Na(1)-C(5T)    | 134.5(4)   |
| O(2T)-Na(1)-C(315)  | 136.2(4)   |
| O(1T)-Na(1)-C(315)  | 97.5(2)    |
| N(6)-Na(1)-C(315)   | 81.77(16)  |
| O(2U)-Na(1)-C(315)  | 150.1(3)   |
| C(319)-Na(1)-C(315) | 48.90(17)  |
| C(320)-Na(1)-C(315) | 26.52(14)  |
| C(318)-Na(1)-C(315) | 55.21(17)  |
| N(5)-Na(1)-C(315)   | 62.21(13)  |
| C(5T)-Na(1)-C(315)  | 132.3(3)   |
| O(2T)-Na(1)-C(4T)   | 115.3(3)   |
| O(1T)-Na(1)-C(4T)   | 24.69(16)  |
| N(6)-Na(1)-C(4T)    | 82.08(18)  |
| O(2U)-Na(1)-C(4T)   | 117.3(3)   |
| C(319)-Na(1)-C(4T)  | 137.0(2)   |
| C(320)-Na(1)-C(4T)  | 112.5(2)   |
| C(318)-Na(1)-C(4T)  | 126.8(2)   |
| N(5)-Na(1)-C(4T)    | 73.87(16)  |
| C(5T)-Na(1)-C(4T)   | 135.9(3)   |

|                    |           |
|--------------------|-----------|
| C(315)-Na(1)-C(4T) | 88.50(19) |
| C(1T)-O(1T)-C(4T)  | 106.0(6)  |
| C(1T)-O(1T)-Na(1)  | 130.1(5)  |
| C(4T)-O(1T)-Na(1)  | 114.3(4)  |
| O(1T)-C(1T)-C(2T)  | 106.2(6)  |
| C(1T)-C(2T)-C(3T)  | 105.1(7)  |
| C(4T)-C(3T)-C(2T)  | 103.8(7)  |
| O(1T)-C(4T)-C(3T)  | 104.0(6)  |
| O(1T)-C(4T)-Na(1)  | 41.0(3)   |
| C(3T)-C(4T)-Na(1)  | 114.0(5)  |
| C(5T)-O(2T)-C(8T)  | 109.9(11) |
| C(5T)-O(2T)-Na(1)  | 112.7(9)  |
| C(8T)-O(2T)-Na(1)  | 128.0(15) |
| O(2T)-C(5T)-C(6T)  | 106.0(12) |
| O(2T)-C(5T)-Na(1)  | 42.1(6)   |
| C(6T)-C(5T)-Na(1)  | 126.7(14) |
| C(5T)-C(6T)-C(7T)  | 105.2(13) |
| C(8T)-C(7T)-C(6T)  | 106.7(13) |
| O(2T)-C(8T)-C(7T)  | 106.7(13) |
| C(5U)-O(2U)-C(8U)  | 105.2(11) |
| C(5U)-O(2U)-Na(1)  | 114.9(11) |
| C(8U)-O(2U)-Na(1)  | 137.2(9)  |
| O(2U)-C(5U)-C(6U)  | 106.9(13) |
| C(7U)-C(6U)-C(5U)  | 101.8(15) |
| C(8U)-C(7U)-C(6U)  | 102.5(13) |
| O(2U)-C(8U)-C(7U)  | 108.2(11) |
| C(3X)-C(2X)-C(1X)  | 110.6(19) |
| C(2X)-C(3X)-C(4X)  | 111.4(19) |
| C(5X)-C(4X)-C(3X)  | 107.0(17) |
| C(4X)-C(5X)-C(6X)  | 101.6(17) |
| C(7X)-C(6X)-C(5X)  | 107.8(18) |
| C(3Y)-C(2Y)-C(1Y)  | 117(2)    |
| C(2Y)-C(3Y)-C(4Y)  | 108.7(19) |
| C(5Y)-C(4Y)-C(3Y)  | 106(2)    |
| C(6Y)-C(5Y)-C(4Y)  | 113(3)    |
| C(5Y)-C(6Y)-C(7Y)  | 112(2)    |

|                   |       |
|-------------------|-------|
| C(3W)-C(2W)-C(1W) | 98.2  |
| C(2W)-C(3W)-C(4W) | 105.3 |
| C(3W)-C(4W)-C(5W) | 126.5 |
| C(1G)-O(1G)-C(4G) | 108.0 |
| O(1G)-C(1G)-C(2G) | 108.0 |
| C(3G)-C(2G)-C(1G) | 108.0 |
| C(2G)-C(3G)-C(4G) | 108.0 |
| O(1G)-C(4G)-C(3G) | 108.0 |

---

**Table 9. Anisotropic displacement parameters ( $\text{\AA}^2 \times 10^3$ ) for 04169. The anisotropic displacement factor exponent takes the form:  $-2p^2[ h^2 a^{*2}U^{11} + \dots + 2 h k a^* b^* U^{12} ]$**

|        | U <sup>11</sup> | U <sup>22</sup> | U <sup>33</sup> | U <sup>23</sup> | U <sup>13</sup> | U <sup>12</sup> |
|--------|-----------------|-----------------|-----------------|-----------------|-----------------|-----------------|
| Mo(1)  | 28(1)           | 25(1)           | 27(1)           | -1(1)           | -3(1)           | 13(1)           |
| N(1)   | 33(2)           | 29(2)           | 31(2)           | -1(2)           | -1(2)           | 15(2)           |
| N(2)   | 29(2)           | 38(2)           | 36(2)           | -8(2)           | -10(2)          | 16(2)           |
| N(3)   | 35(2)           | 23(2)           | 28(2)           | 1(2)            | -1(2)           | 13(2)           |
| N(4)   | 41(2)           | 41(2)           | 29(2)           | 1(2)            | 0(2)            | 23(2)           |
| N(5)   | 25(2)           | 27(2)           | 36(2)           | 1(2)            | 0(2)            | 12(2)           |
| N(6)   | 35(2)           | 40(2)           | 48(3)           | 16(2)           | 4(2)            | 19(2)           |
| C(1)   | 45(3)           | 46(3)           | 29(3)           | 2(2)            | 6(2)            | 24(3)           |
| C(2)   | 49(3)           | 48(3)           | 30(3)           | 9(2)            | 5(2)            | 27(3)           |
| C(3)   | 43(3)           | 48(3)           | 41(3)           | -11(2)          | -15(2)          | 26(3)           |
| C(4)   | 50(3)           | 63(4)           | 30(3)           | -3(2)           | -13(2)          | 34(3)           |
| C(5)   | 48(3)           | 32(3)           | 35(3)           | 6(2)            | 3(2)            | 24(3)           |
| C(6)   | 48(3)           | 41(3)           | 35(3)           | 12(2)           | 1(2)            | 26(3)           |
| C(115) | 29(3)           | 26(2)           | 31(2)           | 1(2)            | 0(2)            | 13(2)           |
| C(116) | 30(3)           | 23(2)           | 32(2)           | -2(2)           | -2(2)           | 11(2)           |
| C(117) | 30(3)           | 28(3)           | 34(3)           | 4(2)            | 2(2)            | 9(2)            |
| C(118) | 45(3)           | 29(3)           | 31(3)           | -4(2)           | 8(2)            | 8(2)            |
| C(119) | 41(3)           | 27(3)           | 39(3)           | -2(2)           | 8(2)            | 11(2)           |
| C(120) | 39(3)           | 23(2)           | 38(3)           | 4(2)            | 9(2)            | 13(2)           |
| C(121) | 36(3)           | 30(3)           | 30(3)           | 0(2)            | -1(2)           | 7(2)            |
| C(122) | 45(3)           | 33(3)           | 38(3)           | 0(2)            | 11(2)           | 12(3)           |
| C(123) | 44(3)           | 37(3)           | 41(3)           | 2(2)            | 12(3)           | 9(3)            |
| C(124) | 45(3)           | 50(4)           | 44(3)           | 18(3)           | 2(3)            | 4(3)            |
| C(125) | 41(3)           | 64(4)           | 75(5)           | 42(4)           | -7(3)           | 11(3)           |
| C(126) | 34(3)           | 56(4)           | 45(3)           | 23(3)           | -6(2)           | 8(3)            |
| C(127) | 59(4)           | 45(4)           | 114(6)          | 29(4)           | 47(4)           | 32(3)           |
| C(128) | 98(7)           | 123(8)          | 120(7)          | 27(5)           | -9(5)           | 80(7)           |
| C(129) | 116(8)          | 83(6)           | 182(10)         | 16(6)           | 79(7)           | 64(6)           |
| C(130) | 53(4)           | 71(5)           | 59(4)           | 39(3)           | 4(3)            | 7(4)            |
| C(131) | 84(6)           | 118(8)          | 78(5)           | 63(5)           | -12(5)          | -7(6)           |
| C(132) | 89(6)           | 64(5)           | 96(6)           | 45(4)           | 22(5)           | 14(5)           |

|        |         |         |         |          |         |        |
|--------|---------|---------|---------|----------|---------|--------|
| C(133) | 32(3)   | 78(5)   | 82(5)   | 47(4)    | -2(3)   | 17(3)  |
| C(134) | 41(4)   | 69(5)   | 151(8)  | 27(5)    | -20(5)  | 7(4)   |
| C(135) | 44(4)   | 98(5)   | 66(4)   | 38(4)    | 0(3)    | 31(4)  |
| C(136) | 62(4)   | 27(3)   | 38(3)   | -4(2)    | 21(3)   | 9(3)   |
| C(137) | 84(4)   | 29(3)   | 34(3)   | -6(2)    | 3(3)    | 16(3)  |
| C(138) | 113(6)  | 32(3)   | 44(4)   | -9(3)    | 2(4)    | 17(4)  |
| C(139) | 124(6)  | 34(4)   | 66(5)   | -7(3)    | 40(4)   | 28(4)  |
| C(140) | 100(5)  | 28(3)   | 115(7)  | -1(4)    | 61(5)   | 18(4)  |
| C(141) | 78(4)   | 25(3)   | 92(5)   | 0(3)     | 48(4)   | 15(3)  |
| C(142) | 82(5)   | 36(4)   | 83(5)   | -24(3)   | -42(4)  | 19(3)  |
| C(143) | 73(5)   | 65(5)   | 107(6)  | -32(4)   | -32(4)  | 30(4)  |
| C(144) | 132(9)  | 59(5)   | 118(7)  | 0(5)     | -63(6)  | 24(5)  |
| C(145) | 183(10) | 42(4)   | 95(6)   | -26(4)   | 47(6)   | 32(5)  |
| C(146) | 213(12) | 27(4)   | 90(6)   | -7(4)    | 47(7)   | 24(5)  |
| C(147) | 114(7)  | 56(4)   | 60(4)   | -21(3)   | 3(4)    | 38(5)  |
| C(148) | 65(4)   | 42(4)   | 184(9)  | -13(5)   | 45(5)   | 23(4)  |
| C(149) | 81(7)   | 71(7)   | 249(12) | -2(8)    | -25(7)  | 25(6)  |
| C(150) | 109(8)  | 96(8)   | 314(16) | 2(10)    | 119(11) | 41(7)  |
| C(215) | 25(3)   | 21(2)   | 43(3)   | -5(2)    | -2(2)   | 8(2)   |
| C(216) | 39(3)   | 34(3)   | 37(3)   | -9(2)    | 0(2)    | 18(2)  |
| C(217) | 34(3)   | 34(3)   | 50(3)   | -10(2)   | 1(2)    | 16(2)  |
| C(218) | 35(3)   | 36(3)   | 48(3)   | -7(2)    | -5(2)   | 20(3)  |
| C(219) | 26(3)   | 25(3)   | 45(3)   | -5(2)    | 0(2)    | 10(2)  |
| C(220) | 26(3)   | 25(3)   | 37(3)   | -5(2)    | -3(2)   | 10(2)  |
| C(221) | 37(3)   | 56(3)   | 48(3)   | -17(3)   | -6(2)   | 28(3)  |
| C(222) | 53(4)   | 69(4)   | 65(4)   | -28(3)   | -12(3)  | 41(3)  |
| C(223) | 65(4)   | 94(5)   | 74(5)   | -44(4)   | -14(3)  | 54(4)  |
| C(224) | 52(4)   | 112(6)  | 70(4)   | -41(4)   | -6(3)   | 50(4)  |
| C(225) | 51(4)   | 89(5)   | 51(4)   | -11(3)   | 4(3)    | 40(4)  |
| C(226) | 51(3)   | 65(4)   | 39(3)   | -6(3)    | 0(3)    | 35(3)  |
| C(227) | 56(4)   | 60(4)   | 99(5)   | -30(4)   | -7(4)   | 34(3)  |
| C(228) | 86(6)   | 67(5)   | 123(7)  | -18(5)   | -4(5)   | 43(5)  |
| C(229) | 81(6)   | 87(6)   | 128(8)  | -49(6)   | -23(5)  | 27(5)  |
| C(230) | 100(6)  | 187(10) | 69(5)   | -49(6)   | 1(4)    | 89(7)  |
| C(231) | 107(16) | 250(40) | 92(15)  | -70(20)  | 7(12)   | 36(19) |
| C(232) | 68(10)  | 290(30) | 102(15) | -136(18) | 33(10)  | 31(12) |

|        |         |         |        |         |        |         |
|--------|---------|---------|--------|---------|--------|---------|
| C(31B) | 102(17) | 210(30) | 89(10) | -7(14)  | 22(12) | 94(18)  |
| C(32B) | 121(16) | 180(20) | 79(12) | -21(11) | 36(11) | 107(17) |
| C(233) | 54(4)   | 53(4)   | 45(3)  | 2(3)    | 11(3)  | 26(3)   |
| C(234) | 70(5)   | 67(4)   | 65(4)  | 11(3)   | 13(4)  | 40(4)   |
| C(235) | 56(4)   | 60(4)   | 58(4)  | 2(3)    | 6(3)   | 29(3)   |
| C(236) | 22(3)   | 36(3)   | 46(3)  | 0(2)    | -3(2)  | 15(2)   |
| C(237) | 28(3)   | 41(3)   | 43(3)  | 2(2)    | 0(2)   | 17(2)   |
| C(238) | 33(3)   | 52(3)   | 44(3)  | 4(3)    | -4(2)  | 22(3)   |
| C(239) | 40(3)   | 60(4)   | 54(3)  | 13(3)   | 0(3)   | 32(3)   |
| C(240) | 41(3)   | 51(4)   | 65(4)  | 15(3)   | -3(3)  | 28(3)   |
| C(241) | 27(3)   | 40(3)   | 61(3)  | 5(3)    | 3(2)   | 20(2)   |
| C(242) | 42(3)   | 36(3)   | 35(3)  | -2(2)   | -1(2)  | 13(3)   |
| C(243) | 56(4)   | 38(3)   | 51(4)  | -2(3)   | 2(3)   | 24(3)   |
| C(244) | 47(4)   | 49(4)   | 52(4)  | -3(3)   | 0(3)   | 8(3)    |
| C(245) | 65(4)   | 72(5)   | 57(4)  | 15(3)   | -8(3)  | 39(4)   |
| C(246) | 69(8)   | 104(12) | 50(7)  | 23(7)   | -5(6)  | 38(7)   |
| C(247) | 97(12)  | 86(9)   | 63(8)  | 4(7)    | -16(8) | 48(8)   |
| C(46B) | 77(12)  | 82(13)  | 50(7)  | 13(8)   | -1(7)  | 31(10)  |
| C(47B) | 80(12)  | 260(30) | 67(12) | 33(16)  | -11(9) | 88(16)  |
| C(248) | 38(3)   | 35(3)   | 76(4)  | 3(3)    | 0(3)   | 20(3)   |
| C(249) | 44(4)   | 47(4)   | 91(5)  | -1(4)   | -4(3)  | 16(3)   |
| C(250) | 56(4)   | 46(4)   | 97(5)  | 0(4)    | -4(4)  | 33(3)   |
| C(315) | 22(2)   | 35(3)   | 45(3)  | -10(2)  | -5(2)  | 12(2)   |
| C(316) | 32(3)   | 43(3)   | 44(3)  | -14(2)  | -3(2)  | 18(2)   |
| C(317) | 29(3)   | 39(3)   | 51(3)  | -15(3)  | -4(2)  | 10(2)   |
| C(318) | 33(3)   | 40(3)   | 56(3)  | -8(3)   | 3(2)   | 4(2)    |
| C(319) | 29(3)   | 44(3)   | 50(3)  | -12(2)  | -1(2)  | 8(2)    |
| C(320) | 26(3)   | 37(3)   | 43(3)  | -12(2)  | -4(2)  | 9(2)    |
| C(321) | 47(4)   | 42(3)   | 63(4)  | -15(3)  | -1(3)  | 8(3)    |
| C(322) | 47(4)   | 56(4)   | 52(4)  | -13(3)  | 7(3)   | 0(3)    |
| Na(1)  | 52(2)   | 35(1)   | 146(3) | 21(2)   | 35(2)  | 23(1)   |
| O(1T)  | 43(2)   | 38(2)   | 111(4) | -9(2)   | 1(2)   | 10(2)   |
| C(1T)  | 80(6)   | 52(5)   | 166(8) | -45(5)  | -40(6) | 22(4)   |
| C(2T)  | 119(8)  | 116(7)  | 126(7) | -60(6)  | -60(6) | 78(7)   |
| C(3T)  | 87(6)   | 86(5)   | 92(5)  | -12(4)  | -9(4)  | 55(5)   |
| C(4T)  | 46(4)   | 47(4)   | 85(4)  | -13(3)  | 7(3)   | 13(3)   |

|       |         |         |         |         |         |         |
|-------|---------|---------|---------|---------|---------|---------|
| O(2T) | 54(7)   | 39(5)   | 92(7)   | 0(5)    | 8(5)    | 23(5)   |
| C(5T) | 91(11)  | 65(8)   | 93(8)   | 18(6)   | 19(7)   | 51(8)   |
| C(6T) | 141(16) | 132(14) | 105(9)  | 5(9)    | 0(11)   | 106(13) |
| C(7T) | 111(15) | 86(13)  | 100(11) | -1(11)  | -7(12)  | 70(12)  |
| C(8T) | 47(10)  | 37(8)   | 100(9)  | -5(8)   | -6(10)  | 22(8)   |
| O(2U) | 58(7)   | 29(5)   | 110(7)  | 7(5)    | -1(5)   | 15(5)   |
| C(5U) | 79(13)  | 37(9)   | 112(10) | 7(8)    | -11(12) | 23(9)   |
| C(6U) | 113(15) | 53(8)   | 120(13) | 11(7)   | -35(11) | 38(10)  |
| C(7U) | 117(14) | 72(10)  | 112(11) | 6(8)    | -24(10) | 47(10)  |
| C(8U) | 115(14) | 66(9)   | 108(9)  | 5(8)    | 10(10)  | 43(10)  |
| C(1X) | 119(15) | 115(13) | 87(12)  | 20(10)  | 24(11)  | 80(13)  |
| C(2X) | 200(30) | 93(16)  | 290(30) | -27(15) | 0(20)   | 63(18)  |
| C(3X) | 170(20) | 108(13) | 220(20) | 48(13)  | 129(18) | 77(15)  |
| C(4X) | 220(20) | 67(11)  | 210(20) | 72(11)  | 134(19) | 33(14)  |
| C(5X) | 270(20) | 93(11)  | 210(20) | 92(12)  | 208(19) | 96(15)  |
| C(6X) | 270(30) | 96(13)  | 290(30) | 69(13)  | 220(20) | 99(16)  |
| C(7X) | 86(13)  | 90(10)  | 80(12)  | 7(9)    | 3(10)   | 12(10)  |
| C(1Y) | 420(40) | 160(30) | 190(30) | 0(20)   | -90(30) | 170(30) |
| C(2Y) | 370(30) | 140(20) | 240(30) | 40(20)  | 70(30)  | 110(20) |
| C(3Y) | 410(30) | 71(18)  | 310(30) | 70(20)  | 80(30)  | 63(18)  |
| C(4Y) | 320(30) | 79(19)  | 450(40) | 100(20) | 140(30) | 16(19)  |
| C(5Y) | 340(40) | 190(30) | 530(50) | 150(30) | 100(40) | 100(30) |
| C(6Y) | 370(40) | 150(20) | 630(60) | 220(30) | 190(50) | 130(30) |
| C(7Y) | 390(50) | 150(30) | 620(80) | 290(40) | 170(60) | 80(30)  |
| C(1W) | 57(15)  | 160(20) | 110(20) | -79(18) | 57(14)  | -53(13) |
| C(2W) | 78(14)  | 142(17) | 73(16)  | 56(14)  | 34(13)  | 19(15)  |
| C(3W) | 41(12)  | 210(20) | 65(15)  | 34(17)  | -33(12) | -32(13) |
| C(4W) | 76(19)  | 240(30) | 150(30) | 20(20)  | -26(15) | 70(20)  |
| C(5W) | 190(40) | 140(30) | 210(40) | 60(20)  | 60(30)  | 140(30) |
| O(1G) | 126(14) | 105(16) | 95(14)  | -13(13) | -24(16) | 62(12)  |
| C(1G) | 126(13) | 101(14) | 109(15) | -11(11) | -13(12) | 57(10)  |
| C(2G) | 142(14) | 125(14) | 153(17) | 14(13)  | 7(13)   | 71(11)  |
| C(3G) | 142(14) | 125(14) | 153(17) | 14(13)  | 7(13)   | 71(11)  |
| C(4G) | 126(13) | 101(14) | 109(15) | -11(11) | -13(12) | 57(10)  |

---

**Table 10. Hydrogen coordinates (  $\times 10^4$ ) and isotropic displacement parameters ( $\text{\AA}^2 \times 10^{-3}$ ) for 04169.**

|        | x    | y    | z    | U(eq) |
|--------|------|------|------|-------|
| H(1A)  | 414  | 7458 | 2121 | 47    |
| H(1B)  | 910  | 7930 | 2196 | 47    |
| H(2A)  | 1038 | 7293 | 2268 | 49    |
| H(2B)  | 804  | 7053 | 1992 | 49    |
| H(3A)  | 2436 | 8664 | 2084 | 51    |
| H(3B)  | 2472 | 8256 | 1923 | 51    |
| H(4A)  | 1974 | 7849 | 2257 | 54    |
| H(4B)  | 1697 | 8145 | 2236 | 54    |
| H(5A)  | 1521 | 6875 | 1526 | 44    |
| H(5B)  | 1033 | 6820 | 1643 | 44    |
| H(6A)  | 1555 | 7027 | 1995 | 47    |
| H(6B)  | 1983 | 7452 | 1833 | 47    |
| H(116) | 1738 | 8024 | 1039 | 35    |
| H(118) | 1489 | 7110 | 440  | 48    |
| H(120) | 1088 | 6598 | 1178 | 42    |
| H(123) | 2977 | 8694 | 269  | 55    |
| H(125) | 1868 | 8929 | 245  | 80    |
| H(127) | 2406 | 7635 | 663  | 84    |
| H(12A) | 2859 | 8315 | 927  | 154   |
| H(12B) | 3275 | 8535 | 711  | 154   |
| H(12C) | 3160 | 8055 | 864  | 154   |
| H(12D) | 2638 | 7598 | 228  | 181   |
| H(12E) | 3018 | 7605 | 432  | 181   |
| H(12F) | 3138 | 8081 | 274  | 181   |
| H(130) | 3082 | 9354 | 37   | 85    |
| H(13A) | 2493 | 8951 | -277 | 179   |
| H(13B) | 2762 | 9519 | -320 | 179   |
| H(13C) | 2237 | 9248 | -194 | 179   |
| H(13D) | 3013 | 9790 | 365  | 140   |
| H(13E) | 2567 | 9777 | 219  | 140   |



|        |       |       |      |     |
|--------|-------|-------|------|-----|
| H(13F) | 3087  | 10046 | 87   | 140 |
| H(133) | 1128  | 8018  | 693  | 83  |
| H(13G) | 925   | 7575  | 301  | 144 |
| H(13H) | 916   | 8007  | 151  | 144 |
| H(13I) | 533   | 7721  | 377  | 144 |
| H(13J) | 786   | 8495  | 601  | 107 |
| H(13K) | 1200  | 8796  | 392  | 107 |
| H(13L) | 1329  | 8821  | 697  | 107 |
| H(138) | 153   | 5356  | 432  | 86  |
| H(140) | 1473  | 5542  | 552  | 105 |
| H(142) | 402   | 6456  | 737  | 86  |
| H(14A) | -437  | 5952  | 724  | 125 |
| H(14B) | -196  | 5717  | 900  | 125 |
| H(14C) | -373  | 5525  | 609  | 125 |
| H(14D) | 15    | 6491  | 344  | 170 |
| H(14E) | 131   | 6111  | 210  | 170 |
| H(14F) | 559   | 6631  | 290  | 170 |
| H(145) | 891   | 4822  | 422  | 141 |
| H(14G) | 202   | 4516  | 623  | 189 |
| H(14H) | 224   | 4201  | 387  | 189 |
| H(14I) | -50   | 4496  | 349  | 189 |
| H(14J) | 1097  | 5216  | 41   | 117 |
| H(14K) | 543   | 4965  | -39  | 117 |
| H(14L) | 789   | 4646  | 12   | 117 |
| H(148) | 1978  | 6710  | 835  | 119 |
| H(14M) | 1748  | 6120  | 1165 | 209 |
| H(14N) | 2307  | 6349  | 1102 | 209 |
| H(14O) | 1930  | 5831  | 989  | 209 |
| H(15A) | 2247  | 6614  | 420  | 267 |
| H(15B) | 2256  | 6150  | 525  | 267 |
| H(15C) | 2616  | 6666  | 646  | 267 |
| H(216) | 190   | 7969  | 2106 | 44  |
| H(218) | -547  | 8204  | 1539 | 46  |
| H(220) | 548   | 7992  | 1342 | 37  |
| H(223) | -523  | 8850  | 2517 | 86  |
| H(225) | -1522 | 7488  | 2396 | 74  |

|        |       |      |      |     |
|--------|-------|------|------|-----|
| H(227) | 303   | 8903 | 2047 | 84  |
| H(22A) | -201  | 9054 | 1774 | 135 |
| H(22B) | 286   | 9535 | 1844 | 135 |
| H(22C) | -202  | 9414 | 1989 | 135 |
| H(22D) | 654   | 9627 | 2275 | 158 |
| H(22E) | 463   | 9184 | 2474 | 158 |
| H(22F) | 167   | 9457 | 2434 | 158 |
| H(230) | -1393 | 8440 | 2692 | 133 |
| H(30B) | -1652 | 7908 | 2701 | 133 |
| H(23A) | -824  | 8240 | 3002 | 263 |
| H(23B) | -1139 | 8463 | 3106 | 263 |
| H(23C) | -730  | 8744 | 2891 | 263 |
| H(23D) | -1898 | 7866 | 2950 | 268 |
| H(23E) | -1780 | 7513 | 2786 | 268 |
| H(23F) | -1982 | 7815 | 2640 | 268 |
| H(31A) | -868  | 8128 | 3006 | 190 |
| H(31B) | -1333 | 7622 | 2943 | 190 |
| H(31C) | -1374 | 7996 | 3133 | 190 |
| H(32A) | -1654 | 8514 | 2640 | 169 |
| H(32B) | -1143 | 8845 | 2775 | 169 |
| H(32C) | -1595 | 8488 | 2950 | 169 |
| H(233) | -960  | 7314 | 1831 | 61  |
| H(23G) | -1309 | 6564 | 2053 | 97  |
| H(23H) | -1369 | 6810 | 2311 | 97  |
| H(23I) | -845  | 6958 | 2206 | 97  |
| H(23J) | -1802 | 6808 | 1784 | 87  |
| H(23K) | -1656 | 7360 | 1762 | 87  |
| H(23L) | -1889 | 7070 | 2027 | 87  |
| H(238) | -389  | 7623 | 547  | 52  |
| H(240) | 40    | 9003 | 700  | 60  |
| H(242) | -332  | 7291 | 1207 | 49  |
| H(24A) | -15   | 6882 | 971  | 72  |
| H(24B) | 368   | 7442 | 987  | 72  |
| H(24C) | 73    | 7220 | 722  | 72  |
| H(24D) | -880  | 6595 | 976  | 85  |
| H(24E) | -839  | 6913 | 727  | 85  |

|        |       |       |      |     |
|--------|-------|-------|------|-----|
| H(24F) | -1074 | 6964  | 992  | 85  |
| H(245) | -424  | 8604  | 288  | 75  |
| H(45B) | -65   | 8777  | 266  | 75  |
| H(24G) | 396   | 9020  | 267  | 115 |
| H(24H) | 149   | 8835  | -14  | 115 |
| H(24I) | 385   | 8565  | 134  | 115 |
| H(24J) | -865  | 7781  | 236  | 122 |
| H(24K) | -404  | 7786  | 116  | 122 |
| H(24L) | -640  | 8054  | -34  | 122 |
| H(46A) | 301   | 8345  | 161  | 111 |
| H(46B) | -15   | 8376  | -72  | 111 |
| H(46C) | -213  | 7893  | 95   | 111 |
| H(47A) | -867  | 8420  | 358  | 201 |
| H(47B) | -949  | 7931  | 230  | 201 |
| H(47C) | -767  | 8401  | 52   | 201 |
| H(248) | 267   | 8958  | 1379 | 59  |
| H(24M) | 899   | 9712  | 1232 | 96  |
| H(24N) | 761   | 9544  | 934  | 96  |
| H(24O) | 966   | 9286  | 1119 | 96  |
| H(25A) | 83    | 9581  | 1328 | 95  |
| H(25B) | -384  | 9072  | 1275 | 95  |
| H(25C) | -91   | 9412  | 1034 | 95  |
| H(316) | 2611  | 9374  | 1932 | 48  |
| H(318) | 3189  | 10075 | 1254 | 60  |
| H(320) | 2333  | 8632  | 1255 | 46  |
| H(32D) | 3559  | 10320 | 1797 | 85  |
| H(32E) | 3077  | 10243 | 1930 | 85  |
| H(32F) | 3253  | 10525 | 1658 | 85  |
| H(32G) | 3041  | 9200  | 880  | 94  |
| H(32H) | 2988  | 9665  | 846  | 94  |
| H(32I) | 2524  | 9141  | 831  | 94  |
| H(1T1) | 1719  | 10173 | 1837 | 125 |
| H(1T2) | 2198  | 10138 | 1808 | 125 |
| H(2T1) | 1566  | 9781  | 2204 | 134 |
| H(2T2) | 2023  | 9712  | 2164 | 134 |
| H(3T1) | 1581  | 8985  | 1991 | 100 |

|        |      |       |      |     |
|--------|------|-------|------|-----|
| H(3T2) | 1136 | 8997  | 2128 | 100 |
| H(4T1) | 1131 | 8906  | 1641 | 77  |
| H(4T2) | 950  | 9249  | 1762 | 77  |
| H(5T1) | 2243 | 9811  | 776  | 94  |
| H(5T2) | 2697 | 10342 | 808  | 94  |
| H(6T1) | 1781 | 10078 | 623  | 131 |
| H(6T2) | 2283 | 10540 | 544  | 131 |
| H(7T1) | 2233 | 10976 | 860  | 108 |
| H(7T2) | 1674 | 10575 | 871  | 108 |
| H(8T1) | 2322 | 10760 | 1246 | 73  |
| H(8T2) | 1773 | 10332 | 1247 | 73  |
| H(5U1) | 2360 | 10589 | 1217 | 95  |
| H(5U2) | 1791 | 10368 | 1189 | 95  |
| H(6U1) | 2061 | 11002 | 915  | 117 |
| H(6U2) | 2510 | 10949 | 819  | 117 |
| H(7U1) | 1524 | 10340 | 685  | 120 |
| H(7U2) | 1975 | 10572 | 487  | 120 |
| H(8U1) | 1642 | 9718  | 658  | 117 |
| H(8U2) | 2204 | 10050 | 597  | 117 |
| H(1X1) | 1023 | 5375  | -534 | 146 |
| H(1X2) | 1200 | 5747  | -773 | 146 |
| H(1X3) | 663  | 5521  | -665 | 146 |
| H(2X1) | 970  | 5932  | -262 | 241 |
| H(2X2) | 1502 | 6171  | -379 | 241 |
| H(3X1) | 770  | 6312  | -602 | 194 |
| H(3X2) | 1319 | 6579  | -694 | 194 |
| H(4X1) | 1008 | 6713  | -186 | 215 |
| H(4X2) | 1558 | 6984  | -279 | 215 |
| H(5X1) | 805  | 7106  | -509 | 225 |
| H(5X2) | 1327 | 7324  | -644 | 225 |
| H(6X1) | 1159 | 7528  | -115 | 257 |
| H(6X2) | 1688 | 7710  | -229 | 257 |
| H(7X1) | 1508 | 8315  | -272 | 149 |
| H(7X2) | 1026 | 7963  | -428 | 149 |
| H(7X3) | 1537 | 8126  | -558 | 149 |
| H(1Y1) | -192 | 9981  | 3113 | 368 |

|        |       |       |      |     |
|--------|-------|-------|------|-----|
| H(1Y2) | -579  | 9496  | 2973 | 368 |
| H(1Y3) | -520  | 9513  | 3285 | 368 |
| H(2Y1) | -777  | 10096 | 3296 | 308 |
| H(2Y2) | -891  | 10005 | 2990 | 308 |
| H(3Y1) | -1392 | 9307  | 3385 | 349 |
| H(3Y2) | -1510 | 9223  | 3077 | 349 |
| H(4Y1) | -2013 | 9470  | 3321 | 384 |
| H(4Y2) | -1540 | 9990  | 3351 | 384 |
| H(5Y1) | -1495 | 10138 | 2923 | 443 |
| H(5Y2) | -1758 | 9583  | 2846 | 443 |
| H(6Y1) | -2403 | 9728  | 3095 | 456 |
| H(6Y2) | -2414 | 9579  | 2795 | 456 |
| H(7Y1) | -2444 | 10299 | 2830 | 622 |
| H(7Y2) | -1976 | 10391 | 2672 | 622 |
| H(7Y3) | -1933 | 10551 | 2973 | 622 |
| H(1W1) | 2457  | 7930  | 1346 | 237 |
| H(1W2) | 3008  | 8091  | 1296 | 237 |
| H(1W3) | 2779  | 7919  | 1582 | 237 |
| H(2W1) | 2292  | 7139  | 1424 | 136 |
| H(2W2) | 2524  | 7313  | 1136 | 136 |
| H(3W1) | 3104  | 7602  | 1553 | 179 |
| H(3W2) | 3199  | 7489  | 1259 | 179 |
| H(4W1) | 3110  | 6910  | 1528 | 190 |
| H(4W2) | 2702  | 6719  | 1312 | 190 |
| H(5W1) | 2332  | 6235  | 1738 | 229 |
| H(5W2) | 2055  | 6522  | 1679 | 229 |
| H(5W3) | 2468  | 6715  | 1897 | 229 |
| H(1G1) | -131  | 10413 | 542  | 134 |
| H(1G2) | -272  | 10172 | 256  | 134 |
| H(2G1) | 397   | 10700 | 112  | 166 |
| H(2G2) | 537   | 10941 | 397  | 166 |
| H(3G1) | 1024  | 10692 | 443  | 166 |
| H(3G2) | 883   | 10451 | 157  | 166 |
| H(4G1) | 516   | 9768  | 330  | 134 |
| H(4G2) | 656   | 10009 | 616  | 134 |

---
